# Supplementary material for: A Ctnnb1 enhancer transcriptionally regulates Wnt signaling dosage to balance homeostasis and tumorigenesis of intestinal epithelia
Source: eLife journal article supplement (doi:10.7554/elife.98238), 2024-08-07
Supplement: fig1-data1 [file elife-98238-fig1-data1-v1.zip]

## Sheet: Sheet1
	Weight
	WT(g)	Ctnnb1Δi.enh(g)
	22.4	21.85
	22.82	23.16
	24	22.32
	24.24	21.5
	24.79	21
	24.1	21.5
	24.03	20.8
	23.14	21
	21.49	19.2
	20.04	19.25
	18.23	19.81
	18.31	18.03
	21.39	18.38
		18.85
		19.44
		17.3
		19.09
