# Supplementary material for: A Ctnnb1 enhancer transcriptionally regulates Wnt signaling dosage to balance homeostasis and tumorigenesis of intestinal epithelia
Source: eLife journal article supplement (doi:10.7554/elife.98238), 2024-08-07
Supplement: fig1-data2 [file elife-98238-fig1-data2-v1.zip]

## Sheet: Sheet1
WT (cm)	Ctnnb1Δi.enh (cm)
29.78	27.783
25.322	25.151
29.834	26.512
19.065	21.249
19.131	21.339
20.676	23.043
