# Supplementary material for: A Ctnnb1 enhancer transcriptionally regulates Wnt signaling dosage to balance homeostasis and tumorigenesis of intestinal epithelia
Source: eLife journal article supplement (doi:10.7554/elife.98238), 2024-08-07
Supplement: fig1-data3 [file elife-98238-fig1-data3-v1.zip]

## Sheet: Sheet1
WT(cm)	Ctnnb1Δi.enh(cm)
8.81	7.209
7.32	7.551
6.95	6.321
4.783	4.565
4.81	5.478
4.998	5.887
