# Supplementary material for: A Ctnnb1 enhancer transcriptionally regulates Wnt signaling dosage to balance homeostasis and tumorigenesis of intestinal epithelia
Source: eLife journal article supplement (doi:10.7554/elife.98238), 2024-08-07
Supplement: fig1-data5 [file elife-98238-fig1-data5-v1.zip]

## Sheet: Sheet1
WT	Ctnnb1Δi.enh
0.42017	0.316842
0.464149	0.288196
0.369046	0.286625
0.471823	0.333768
0.523239	0.280788
0.395486	0.371801
