# Supplementary material for: A Ctnnb1 enhancer transcriptionally regulates Wnt signaling dosage to balance homeostasis and tumorigenesis of intestinal epithelia
Source: eLife journal article supplement (doi:10.7554/elife.98238), 2024-08-07
Supplement: fig1-data6 [file elife-98238-fig1-data6-v1.zip]

## Sheet: Sheet1
WT	Ctnnb1Δi.enh
1.07604	0.58719
1.15553	0.510255
0.768435	0.449711
