# Supplementary material for: A Ctnnb1 enhancer transcriptionally regulates Wnt signaling dosage to balance homeostasis and tumorigenesis of intestinal epithelia
Source: eLife journal article supplement (doi:10.7554/elife.98238), 2024-08-07
Supplement: fig1-data7 [file elife-98238-fig1-data7-v1.zip]

## Sheet: Sheet1
WT	Ctnnb1Δi.enh
0.801859	0.780882
1.28843	0.576394
0.909713	0.732207
