# Supplementary material for: A Ctnnb1 enhancer transcriptionally regulates Wnt signaling dosage to balance homeostasis and tumorigenesis of intestinal epithelia
Source: eLife journal article supplement (doi:10.7554/elife.98238), 2024-08-07
Supplement: fig1-data8 [file elife-98238-fig1-data8-v1.zip]

## Sheet: Sheet1
	WT			Ctnnb1Δi.enh
Axin2	0.96146	1.04442	0.994126	0.235624	0.250558	0.286656
Lgr5	1.09492	0.887348	1.01773	0.489588	0.457017	0.4867
Mmp7	0.792803	1.06913	1.12159	0.435515	0.403137	0.265217
