# Supplementary material for: A Ctnnb1 enhancer transcriptionally regulates Wnt signaling dosage to balance homeostasis and tumorigenesis of intestinal epithelia
Source: eLife journal article supplement (doi:10.7554/elife.98238), 2024-08-07
Supplement: fig1-figsupp2-data1 [file elife-98238-fig1-figsupp2-data1-v1.zip]

## Sheet: Sheet1
293T
pGL3-Promoter	ieCtnnb1	Scramble
1.02751	3.08607	0.965158
0.9684	3.23732	1.0121
1.00438	3.07182	0.839054
HCT116
pGL3-Promoter	ieCtnnb1	Scramble
0.874525	1.66536	1.11983
1.09029	1.67683	1.10453
1.03522	1.59908	1.11702
HeLa
pGL3-Promoter	ieCtnnb1	Scramble
1.09852	3.38765	1.98549
0.853189	2.76683	2.04648
1.04829	3.30017	2.0642
