# Supplementary material for: A Ctnnb1 enhancer transcriptionally regulates Wnt signaling dosage to balance homeostasis and tumorigenesis of intestinal epithelia
Source: eLife journal article supplement (doi:10.7554/elife.98238), 2024-08-07
Supplement: fig1-figsupp2-data2 [file elife-98238-fig1-figsupp2-data2-v1.zip]

## Sheet: Sheet1
Lgr5-EGFP
	EGFP- cells			EGFP+cells
GFP	0.976392	1.19898	0.875829	7.65696	7.93497	8.30576
Lgr5	0.918776	0.864722	1.2165	5.83786	6.49441	7.7296
Ctnnb1Δi.enh;Lgr5-EGFP
	EGFP- cells			EGFP+cells
GFP	0.947717	0.903251	1.14903	8.16286	7.77986	9.89682
Lgr5	1.01596	0.948523	1.03552	7.47024	7.04076	7.5948
LacZ	Lgr5-EGFP			Ctnnb1Δi.enh;Lgr5-EGFP
EGFP+cells	9.54041e-06	5.08414e-06	6.71193e-06	0.00539748	0.00459466	0.0055406
EGFP- cells	8.458e-06	6.317e-06	9.21e-06	0.004105	0.0044059	0.0036708
