# Supplementary material for: A Ctnnb1 enhancer transcriptionally regulates Wnt signaling dosage to balance homeostasis and tumorigenesis of intestinal epithelia
Source: eLife journal article supplement (doi:10.7554/elife.98238), 2024-08-07
Supplement: fig1-figsupp2-data3 [file elife-98238-fig1-figsupp2-data3-v1.zip]

## Sheet: Sheet1
Liver	WT	Ctnnb1Δi.enh
	0.1312	0.17087
	0.150403	0.151941
	0.134875	0.136536
