# Supplementary material for: A Ctnnb1 enhancer transcriptionally regulates Wnt signaling dosage to balance homeostasis and tumorigenesis of intestinal epithelia
Source: eLife journal article supplement (doi:10.7554/elife.98238), 2024-08-07
Supplement: fig1-figsupp2-data4 [file elife-98238-fig1-figsupp2-data4-v1.zip]

## Sheet: Sheet1
	WT			Ctnnb1Δi.enh
Ulk4	4.9552e-05	3.8981e-05	4.5547e-05	4.5275e-05	5.8758e-05	5.2353e-05
Rpl14	1.36909	1.65429	1.72867	1.25035	1.63868	1.43105
Entpd3	0.000272818	0.000277635	0.000274931	0.000267208	0.000270528	0.000306201
