# Supplementary material for: A Ctnnb1 enhancer transcriptionally regulates Wnt signaling dosage to balance homeostasis and tumorigenesis of intestinal epithelia
Source: eLife journal article supplement (doi:10.7554/elife.98238), 2024-08-07
Supplement: fig2-data1 [file elife-98238-fig2-data1-v1.zip]

## Sheet: Sheet1
	H11i.enh	Ctnnb1Δi.enh
CBC	0.047192	0.072029
TAC	0.11409	0.107487
PC	0.263786	0.144057
GC	0.13388	0.10897
EEC	0.023004	0.013837
TC	0.011671	0.008895
imEC	0.052267	0.085001
mEC	0.101827	0.143934
undefined	0.252283	0.315789
