# Supplementary material for: A Ctnnb1 enhancer transcriptionally regulates Wnt signaling dosage to balance homeostasis and tumorigenesis of intestinal epithelia
Source: eLife journal article supplement (doi:10.7554/elife.98238), 2024-08-07
Supplement: fig2-data2 [file elife-98238-fig2-data2-v1.zip]

## Sheet: Sheet1
H11i.enh	Ctnnb1Δi.enh
7.27037	6.32828
5.03333	5.11111
6.4537	3.41835
6.22778	5.13333
7.77354	3.53704
