# Supplementary material for: A Ctnnb1 enhancer transcriptionally regulates Wnt signaling dosage to balance homeostasis and tumorigenesis of intestinal epithelia
Source: eLife journal article supplement (doi:10.7554/elife.98238), 2024-08-07
Supplement: fig2-data3 [file elife-98238-fig2-data3-v1.zip]

## Sheet: Sheet1
	H11i.enh			Ctnnb1Δi.enh
Lyz1	0.907442	1.07907	1.01349	0.356346	0.452899	0.283918
Pla2g2a	0.731707	1.01669	1.2516	0.354766	0.380873	0.181001
Wnt3	0.971219	1.15836	0.87042	0.478576	0.441894	0.50874
Math1	0.980985	1.06004	0.958979	0.43336	0.423731	0.484176
