# Supplementary material for: A Ctnnb1 enhancer transcriptionally regulates Wnt signaling dosage to balance homeostasis and tumorigenesis of intestinal epithelia
Source: eLife journal article supplement (doi:10.7554/elife.98238), 2024-08-07
Supplement: fig2-data4 [file elife-98238-fig2-data4-v1.zip]

## Sheet: Sheet1
	H11i.enh	Ctnnb1Δi.enh
CBC	0.670251	0.432247
TAC	0.986657	0.870115
