# Supplementary material for: A Ctnnb1 enhancer transcriptionally regulates Wnt signaling dosage to balance homeostasis and tumorigenesis of intestinal epithelia
Source: eLife journal article supplement (doi:10.7554/elife.98238), 2024-08-07
Supplement: fig2-data5 [file elife-98238-fig2-data5-v1.zip]

## Sheet: Sheet1
H11i.enh	Ctnnb1Δi.enh
35.1111	30.75
35.8889	28.3333
39.5556	41.25
45.25	23.375
50.3333	33.75
58.4286	37.25
