# Supplementary material for: A Ctnnb1 enhancer transcriptionally regulates Wnt signaling dosage to balance homeostasis and tumorigenesis of intestinal epithelia
Source: eLife journal article supplement (doi:10.7554/elife.98238), 2024-08-07
Supplement: fig2-data6 [file elife-98238-fig2-data6-v1.zip]

## Sheet: Sheet1
H11i.enh	Ctnnb1Δi.enh
31.6667	35.3333
39.3333	32.3333
46	27.3333
44.6667	31.6667
50.6667	36.3333
38.6667	33
