# Supplementary material for: A Ctnnb1 enhancer transcriptionally regulates Wnt signaling dosage to balance homeostasis and tumorigenesis of intestinal epithelia
Source: eLife journal article supplement (doi:10.7554/elife.98238), 2024-08-07
Supplement: fig2-figsupp1-data1 [file elife-98238-fig2-figsupp1-data1-v1.zip]

## Sheet: Sheet1
WT	Ctnnb1Δi.enh
3.75556	2.41667
3.7037	3.44444
3.17778	3.95833
4.55556	2.75
