# Supplementary material for: A Ctnnb1 enhancer transcriptionally regulates Wnt signaling dosage to balance homeostasis and tumorigenesis of intestinal epithelia
Source: eLife journal article supplement (doi:10.7554/elife.98238), 2024-08-07
Supplement: fig3-data1 [file elife-98238-fig3-data1-v1.zip]

## Sheet: Sheet1
ApcMin/+	Ctnnb1Δi.enh;ApcMin/+
317	195
300	241
237	115
290	213
223	133
238	155
247	93
255	264
270	290
265	165
244	90
180	162
193	158
171	213
330	198
318
350
