# Supplementary material for: A Ctnnb1 enhancer transcriptionally regulates Wnt signaling dosage to balance homeostasis and tumorigenesis of intestinal epithelia
Source: eLife journal article supplement (doi:10.7554/elife.98238), 2024-08-07
Supplement: fig3-data2 [file elife-98238-fig3-data2-v1.zip]

## Sheet: Sheet1
ApcMin/+	Ctnnb1Δi.enh;ApcMin/+
24.59	23.43
19.74	20.58
19.15	20.04
19.8	24.24
17.8	24.89
20.7	27.68
23.6	24.56
20.17	23.39
22.74	28.12
23.29	27.71
23.18	23.63
23.46	26.43
18.71	25.89
21.31	26.16
22.9	27.28
20.48	28.78
22.68	29.61
21	28.62
20	21.53
19	24.02
