# Supplementary material for: A Ctnnb1 enhancer transcriptionally regulates Wnt signaling dosage to balance homeostasis and tumorigenesis of intestinal epithelia
Source: eLife journal article supplement (doi:10.7554/elife.98238), 2024-08-07
Supplement: fig3-data3 [file elife-98238-fig3-data3-v1.zip]

## Sheet: Sheet1
ApcMin/+	Ctnnb1Δi.enh;ApcMin/+
2	0
3	0
4	0
4	1
1	0
1	0
6	0
6	1
3	0
5	0
5	0
0	0
2	0
1	0
3	0
4	0
7	2
2	0
2	0
3	1
