# Supplementary material for: A Ctnnb1 enhancer transcriptionally regulates Wnt signaling dosage to balance homeostasis and tumorigenesis of intestinal epithelia
Source: eLife journal article supplement (doi:10.7554/elife.98238), 2024-08-07
Supplement: fig3-data4 [file elife-98238-fig3-data4-v1.zip]

## Sheet: Sheet1
APCMin/+	Ctnnb1Δi.enh;ApcMin/+
4.045	0.215
3.125	0.606
2.535	1.006
4.353	0.449
2.621	0.801
3.746	0.113
