# Supplementary material for: A Ctnnb1 enhancer transcriptionally regulates Wnt signaling dosage to balance homeostasis and tumorigenesis of intestinal epithelia
Source: eLife journal article supplement (doi:10.7554/elife.98238), 2024-08-07
Supplement: fig3-data5 [file elife-98238-fig3-data5-v1.zip]

## Sheet: Sheet1
APCMin/+	Ctnnb1Δi.enh;ApcMin/+
35986.6	13960.8
50132.3	6009.14
25821.5	11389.8
38987.6	12355.9
30125.6	10154.1
40563.2	8014.26
