# Supplementary material for: A Ctnnb1 enhancer transcriptionally regulates Wnt signaling dosage to balance homeostasis and tumorigenesis of intestinal epithelia
Source: eLife journal article supplement (doi:10.7554/elife.98238), 2024-08-07
Supplement: fig3-data6 [file elife-98238-fig3-data6-v1.zip]

## Sheet: Sheet1
APCMin/+	Ctnnb1Δi.enh;ApcMin/+
79.155	170.845
80.569	149.265
85.462	130.954
90.265	135.154
98.058	110.268
110.256	118.361
