# Supplementary material for: A Ctnnb1 enhancer transcriptionally regulates Wnt signaling dosage to balance homeostasis and tumorigenesis of intestinal epithelia
Source: eLife journal article supplement (doi:10.7554/elife.98238), 2024-08-07
Supplement: fig3-figsupp1-data1 [file elife-98238-fig3-figsupp1-data1-v1.zip]

## Sheet: Sheet1
APCMin/+
<2mm	47	31	44	40	58	95	78	44	48	37	58	80	55	58	57	54	49	47	34	59
>2mm	9	8	3	5	24	11	15	7	6	6	8	10	5	7	8	14	6	5	8	6
Ctnnb1Δi.enh;ApcMin/+
<2mm	13	17	6	37	19	9	5	25	13	11	28	12	20	9	22	21	19	20	21	28
>2mm	4	7	5	15	2	3	4	0	0	2	2	2	1	0	1	3	1	3	4	2
