# Supplementary material for: A Ctnnb1 enhancer transcriptionally regulates Wnt signaling dosage to balance homeostasis and tumorigenesis of intestinal epithelia
Source: eLife journal article supplement (doi:10.7554/elife.98238), 2024-08-07
Supplement: fig3-figsupp1-data2 [file elife-98238-fig3-figsupp1-data2-v1.zip]

## Sheet: Sheet1
	APCMin/+	Ctnnb1Δi.enh;APCMin//+
	1.629	0.877
	1.877	1.53
	1.853	0.71
	1.921	0.205
	2.105	1.046
	1.526	0.582
