# Supplementary material for: A Ctnnb1 enhancer transcriptionally regulates Wnt signaling dosage to balance homeostasis and tumorigenesis of intestinal epithelia
Source: eLife journal article supplement (doi:10.7554/elife.98238), 2024-08-07
Supplement: fig3-figsupp1-data3 [file elife-98238-fig3-figsupp1-data3-v1.zip]

## Sheet: Sheet1
Ki67+	APCMin/+	Ctnnb1Δi.enh;APCMin//+
	12871.6	4483.94
	16783	8827.6
	22148	6392.03
	14386.2	7148.66
	15059.2	10058.6
	8005.69	5056.25
