# Supplementary material for: A Ctnnb1 enhancer transcriptionally regulates Wnt signaling dosage to balance homeostasis and tumorigenesis of intestinal epithelia
Source: eLife journal article supplement (doi:10.7554/elife.98238), 2024-08-07
Supplement: fig3-figsupp1-data4 [file elife-98238-fig3-figsupp1-data4-v1.zip]

## Sheet: Sheet1
APCMin/+	Ctnnb1Δi.enh;APCMin//+
210.546	412.259
201.513	508.649
196.284	450.573
193.159	392.349
180.425	371.529
167.894	301.519
