# Supplementary material for: A Ctnnb1 enhancer transcriptionally regulates Wnt signaling dosage to balance homeostasis and tumorigenesis of intestinal epithelia
Source: eLife journal article supplement (doi:10.7554/elife.98238), 2024-08-07
Supplement: fig4-data1 [file elife-98238-fig4-data1-v1.zip]

## Sheet: Sheet1
	pGL3-Promoter	pGL3-region1	pGL3-region2	pGL3-region3	pGL3-region4	pGL3-region5
	0.999994	2.60532	2.47187	1.85402	2.60151	2.27034
	1	2.99618	1.99718	1.74757	2.37176	2.05843
	1.00001	2.68221	1.74569	1.84633	2.16787	2.58641
