# Supplementary material for: A Ctnnb1 enhancer transcriptionally regulates Wnt signaling dosage to balance homeostasis and tumorigenesis of intestinal epithelia
Source: eLife journal article supplement (doi:10.7554/elife.98238), 2024-08-07
Supplement: fig4-data2 [file elife-98238-fig4-data2-v1.zip]

## Sheet: Sheet1
CRISPR activation		CRISPR interference
sg-scramble	sgRNA1/2/3	sg-scramble	sgRNA1/2/3
0.0490691	0.0734188	0.0715685	0.0632175
0.0520655	0.0670758	0.0760487	0.0552751
0.055879	0.0701068	0.0775004	0.0605294
