# Supplementary material for: A Ctnnb1 enhancer transcriptionally regulates Wnt signaling dosage to balance homeostasis and tumorigenesis of intestinal epithelia
Source: eLife journal article supplement (doi:10.7554/elife.98238), 2024-08-07
Supplement: fig4-figsupp1-data1 [file elife-98238-fig4-figsupp1-data1-v1.zip]

## Sheet: Sheet1
pGL3-Promoter	pGL3-region1	pGL3-region2	pGL3-region3	pGL3-region4	pGL3-region5
0.999992	5.33849	2.81433	3.85044	5.27656	4.72943
1	3.7009	3.3145	3.15967	4.62785	4.04352
0.943695	4.39052	3.26372	3.39065	4.79336	4.47786
