# Supplementary material for: A Ctnnb1 enhancer transcriptionally regulates Wnt signaling dosage to balance homeostasis and tumorigenesis of intestinal epithelia
Source: eLife journal article supplement (doi:10.7554/elife.98238), 2024-08-07
Supplement: fig5-data1 [file elife-98238-fig5-data1-v1.zip]

## Sheet: Sheet1
HCT116			HeLa
pGL3-Promoter	pGL3-region1	pGL3-region1C-T	pGL3-Promoter	pGL3-region1	pGL3-region1C-T
1.00001	2.68221	2.12819	0.999999	3.7009	1.98208
1	3.11399	1.64508	1	2.93657	1.66707
1	4.8315	1.34369	1	5.15131	2.58105
