# Supplementary material for: A Ctnnb1 enhancer transcriptionally regulates Wnt signaling dosage to balance homeostasis and tumorigenesis of intestinal epithelia
Source: eLife journal article supplement (doi:10.7554/elife.98238), 2024-08-07
Supplement: fig6-data1 [file elife-98238-fig6-data1-v1.zip]

## Sheet: Sheet1
scr	ATOH1_sh1&2	CDX2_sh1&2	CREB1_sh1&2	HNF4A_sh1&2	KDM6A_sh1&2	PPARG_sh1&2	VDR_sh1&2	HNF4G_sh1&2
0.921025	0.78741	0.815992	0.559627	0.556741	1.23183	1.03043	1.0405	0.988882
1.11156	0.887818	0.722136	0.565336	0.617674	1.11774	1.23847	1.08037	0.86004
0.967411	0.790896	0.98617	0.608697	0.601753	1.45022	1.2723	1.05935	0.93831
