# Supplementary material for: A Ctnnb1 enhancer transcriptionally regulates Wnt signaling dosage to balance homeostasis and tumorigenesis of intestinal epithelia
Source: eLife journal article supplement (doi:10.7554/elife.98238), 2024-08-07
Supplement: fig6-data2 [file elife-98238-fig6-data2-v1.zip]

## Sheet: Sheet1
ieCTNNB1	IgG			CREB (phospho S133)			CREB
Region1	0.741221	1.08424	1.17454	2.4757	2.21489	1.94502	0.53619	0.588767	0.422085
Region2	0.884981	0.917692	1.19733	1.49881	1.56456	1.35296	0.418815	0.514763	0.440251
Region3	0.914054	0.979659	1.10629	2.53334	2.91883	3.25026	0.433242	0.570509	0.531548
Region4	0.899612	1.01381	1.08658	7.4765	7.20301	6.80528	0.401123	0.405341	0.657479
Region5	1.03961	0.856903	1.10349	4.13013	3.85355	4.38373	0.486754	0.419705	0.369359
Region6	0.769093	1.09427	1.13663	1.38478	1.04947	1.4749	0.531088	0.510321	0.435475
HCT15	IgG			HNF4a
Region1	1.09738	1.02969	0.872938	2.13092	1.7201	2.04676
Region2	0.897416	1.01521	1.08737	1.38536	1.50522	1.55052
Region3	1.18505	0.971974	0.842976	1.95138	1.52744	1.34966
Region4	1.02334	1.04967	0.926991	1.30544	1.27063	1.46771
Region5	0.979659	0.973747	1.04659	3.07619	2.85186	3.39953
Region6	1.04178	1.08909	0.869131	0.949916	0.722371	0.709955
