# Supplementary material for: A Ctnnb1 enhancer transcriptionally regulates Wnt signaling dosage to balance homeostasis and tumorigenesis of intestinal epithelia
Source: eLife journal article supplement (doi:10.7554/elife.98238), 2024-08-07
Supplement: fig6-data3 [file elife-98238-fig6-data3-v1.zip]

## Sheet: Sheet1
CTNNB1 promoter	IgG			CREB (phospho S133)			CREB
Region1	1.13344	0.847481	1.01908	2.56192	2.96566	3.06586	0.343994	0.372498	0.365219
Region2	0.779584	0.97061	1.24981	1.43364	1.53232	1.41645	0.344003	0.387413	0.355767
Region3	0.767855	1.0904	1.14175	0.854764	0.748858	0.950286	0.424191	0.373074	0.408002
Region4	1.10866	0.756243	1.13509	1.42822	1.65224	1.58229	0.307351	0.277558	0.284916
Region5	0.800106	1.03956	1.16033	2.60425	2.51201	2.78407	0.745562	0.881287	0.951335
Region6	1.0085	1.01168	0.979823	1.05498	1.06385	0.885841	0.354165	0.400269	0.350404
HCT15	IgG			HNF4a
Region1	0.830789	0.946209	1.223	0.880465	0.948527	0.73037
Region2	0.943872	1.00228	1.05385	1.22299	1.38015	1.28986
Region3	1.06828	0.92647	1.00525	1.85512	1.6084	1.38337
Region4	1.0803	0.979159	0.94054	1.95684	2.01548	2.14562
Region5	0.881586	0.985906	1.13251	0.895913	0.960215	0.810086
Region6	0.954568	1.0146	1.03083	1.13081	1.21198	0.988688
