# Supplementary material for: A Ctnnb1 enhancer transcriptionally regulates Wnt signaling dosage to balance homeostasis and tumorigenesis of intestinal epithelia
Source: eLife journal article supplement (doi:10.7554/elife.98238), 2024-08-07
Supplement: fig6-data4 [file elife-98238-fig6-data4-v1.zip]

## Sheet: Sheet1
Ctnnb1 promoter	Native HNF4a			APCMin/+ HNF4a			Ctnnb1Δi.enh;APCMin/+ HNF4a
Region1	3.55024	3.45491	3.66155	5.03437	5.09948	5.09686	0.902938	0.966928	1.14136
Region2	4.1901	4.07841	4.17229	4.96098	5.72791	5.91086	1.42966	1.35632	1.52133
Region3	5.82449	5.63838	5.45104	6.12394	7.07205	6.66295	1.35073	1.28643	1.27484
Region4	4.26274	5.0325	4.51181	4.0285	3.97457	4.71849	0.855279	1.03373	0.905999
Region5	3.9997	3.7229	3.56956	7.3796	7.14109	6.67132	0.844287	0.920915	0.989059
Region6	2.33336	2.58378	2.84452	5.63854	6.53668	6.09739	1.08923	0.95697	1.00303
Region7	2.45202	2.50405	2.1439	8.27634	7.53355	7.65768	1.31796	1.10018	1.23232
