# Supplementary material for: A Ctnnb1 enhancer transcriptionally regulates Wnt signaling dosage to balance homeostasis and tumorigenesis of intestinal epithelia
Source: eLife journal article supplement (doi:10.7554/elife.98238), 2024-08-07
Supplement: fig6-data5 [file elife-98238-fig6-data5-v1.zip]

## Sheet: Sheet1
Ctnnb1 promoter	Native creb (phospho S133)			APCMin/+ creb(phospho-S133)			Ctnnb1Δi.enh;APCMin/+ creb(phospho-S133)
Region1	3.52273	4.88438	3.3988	6.20892	5.25166	6.36321	3.59077	3.43931	3.28855
Region2	4.46884	4.7934	4.66217	11.5784	12.3663	12.5478	3.29122	3.22113	3.3052
Region3	5.26077	5.4582	5.68533	8.18954	7.5769	7.89836	1.75066	1.5259	1.31379
Region4	6.67887	5.98401	6.06533	10.4185	10.673	8.35155	7.11154	7.23928	6.71356
Region5	3.78717	3.24551	3.10786	7.75683	8.22536	7.5255	5.66641	5.72675	4.24794
Region6	2.92542	2.58269	2.64143	15.993	17.9628	17.54	0.974926	0.986766	1.20469
Region7	3.68961	4.14046	3.86381	12.3386	10.0845	12.1642	0.736642	0.600776	0.702465
