# Supplementary material for: A Ctnnb1 enhancer transcriptionally regulates Wnt signaling dosage to balance homeostasis and tumorigenesis of intestinal epithelia
Source: eLife journal article supplement (doi:10.7554/elife.98238), 2024-08-07
Supplement: fig6-figsupp1-data1 [file elife-98238-fig6-figsupp1-data1-v1.zip]

## Sheet: Sheet1
pLKO.1_scr	HNF4A_sh1&2	pLKO.1_scr	KDM6A_sh1&2	pLKO.1_scr	PPARG_sh1&2	pLKO.1_scr	VDR_sh1&2	pLKO.1_scr	HNF4G_sh1&2
0.96663	0.252397	0.970516	0.706989	1.059	0.494237	0.944492	0.382683	0.907142	0.627782
1.04859	0.259692	1.01953	0.67381	0.995052	0.651256	0.995378	0.411159	0.916624	0.696744
0.984779	0.210906	1.00995	0.590928	0.945948	0.611474	1.06013	0.394482	1.17623	0.641626
