# Supplementary material for: A Ctnnb1 enhancer transcriptionally regulates Wnt signaling dosage to balance homeostasis and tumorigenesis of intestinal epithelia
Source: eLife journal article supplement (doi:10.7554/elife.98238), 2024-08-07
Supplement: fig6-figsupp1-data2 [file elife-98238-fig6-figsupp1-data2-v1.zip]

## Sheet: Sheet1
	lgG			HNF4α
Region1	0.718202	1.58332	0.879398	4.4496	3.19841	3.913
Region2	0.801336	1.1227	1.11153	4.41427	3.45707	4.05525
Region3	1.1574	0.945493	0.913812	3.87392	4.90046	3.84825
Region4	1.14506	0.966073	0.903989	7.71386	8.62495	10.7705
Region5	1.14274	0.961826	0.90982	26.1791	28.5883	31.131
Region6	0.963829	1.18158	0.878088	8.55453	10.3847	10.5047
Region7	1.06339	0.794482	1.18365	11.3379	12.4608	11.339
	IgG			CREB (phospho S133)			CREB
Region1	1.03378	0.845308	1.14434	3.52273	4.88438	3.3988	0.957225	1.34746	1.03309
Region2	1.0145	1.12125	0.87911	3.46884	3.7934	2.66217	1.75044	1.68712	1.26066
Region3	1.07624	1.10864	0.838113	5.86077	6.74582	5.68533	2.93322	2.42947	2.07269
Region4	1.00204	1.20465	0.828423	6.67887	5.98401	5.06533	1.36712	1.60853	1.7856
Region5	1.11403	0.864102	1.03881	2.78717	2.24551	2.10786	2.01271	1.55054	1.62115
Region6	0.954597	1.0336	1.01351	4.92542	3.58269	4.64144	1.29591	1.54051	1.55114
Region7	1.05164	0.993114	0.957488	2.68961	3.14046	2.86381	2.67001	1.89543	2.11137
