# Supplementary material for: A Ctnnb1 enhancer transcriptionally regulates Wnt signaling dosage to balance homeostasis and tumorigenesis of intestinal epithelia
Source: eLife journal article supplement (doi:10.7554/elife.98238), 2024-08-07
Supplement: fig6-figsupp1-data3 [file elife-98238-fig6-figsupp1-data3-v1.zip]

## Sheet: Sheet1
	IgG			WT-HNF4α			Ctnnb1Δi.enh-HNF4α
Region1	1.09725	1.01478	0.887967	3.28122	3.05257	2.91445	2.0324	2.05704	1.90586
Region2	1.09724	1.00668	0.896077	4.24903	3.79935	3.7392	2.35211	2.49936	2.35801
Region3	0.930824	1.04418	1.02499	5.17707	5.04571	4.96222	1.16805	1.36403	1.32608
Region4	1.07113	1.04512	0.883755	4.71394	5.04946	4.24941	2.00894	2.34015	2.14677
Region5	1.04761	1.01346	0.938926	3.60551	3.64969	3.49961	2.57382	2.84302	2.44208
Region6	0.973797	1.01981	1.00639	1.99621	1.83905	1.924	1.4566	1.31144	1.32728
Region7	0.982347	1.05906	0.958596	1.57611	1.41955	1.55007	0.861976	0.909546	0.974224
	IgG			WT-CREB (phospho S133)			Ctnnb1Δi.enh-CREB (phospho S133)
Region1	0.934667	0.986017	1.07932	3.69306	3.71815	3.66948	0.770414	0.663262	0.829996
Region2	0.884953	1.12317	0.991881	4.43473	4.91021	4.80307	0.837312	0.686831	0.606079
Region3	0.845388	1.06807	1.08654	4.92758	4.4581	4.43008	0.686643	0.729453	0.731698
Region4	1.09304	0.8817	1.02526	5.89906	5.41779	4.98918	0.578893	0.45216	0.476001
Region5	0.94533	0.904742	1.14993	2.74428	2.73699	2.57195	0.72734	0.830481	0.81203
Region6	0.984832	1.01484	1.00033	1.54608	1.65032	1.99708	0.813428	0.966979	1.06708
Region7	0.906212	1.17493	0.918862	3.20175	2.95927	2.83758	1.06033	0.98357	1.15787
