# Supplementary material for: A Ctnnb1 enhancer transcriptionally regulates Wnt signaling dosage to balance homeostasis and tumorigenesis of intestinal epithelia
Source: eLife journal article supplement (doi:10.7554/elife.98238), 2024-08-07
Supplement: fig6-figsupp1-data4 [file elife-98238-fig6-figsupp1-data4-v1.zip]

## Sheet: ieCtnnb1 
Predicted TFs of gieCtnnb1	Score	Relative score	Predicted sequence
MA0130.1.ZNF354C	8.91578	1	ATCCAC
MA0157.2.FOXO3	14.5271	1	GTAAACAA
MA0850.1.FOXP3	11.3004	1	GTAAACA
MA0036.1.GATA2	6.65143	1	GGATA
MA1536.1.NR2C2	10.2284	1	GAGGTCAT
MA0161.1.NFIC	9.69743	1	TTGGCA
MA0598.1.EHF	13.8272	1	CCTTCCTG
MA0849.1.FOXO6	13.2574	1	GTAAACA
MA0848.1.FOXO4	12.7136	1	GTAAACA
MA0081.1.SPIB	10.4696	1	AGAGGAA
MA1489.1.FOXN3	15.4173	1	GTAAACAA
MA0042.2.FOXI1	13.2222	1	GTAAACA
MA0033.2.FOXL1	12.2661	1	GTAAACA
MA0098.1.ETS1	7.79718	1	TTTCCG
MA0877.2.BARHL1	10.9889	1	CTAAACGG
MA0442.1.SOX10	8.90979	1	CTTTGT
MA0703.1.LMX1B	11.0568	1	TTAATTAA
MA0702.2.LMX1A	13.7934	1	TTAATTAA
MA0702.1.LMX1A	12.3996	1	TTAATTAA
MA0037.1.GATA3	8.38812	1	AGATAG
MA0682.2.PITX1	12.9525	1	CTAATCCC
MA0160.2.NR4A2	14.999	1	TTAAAGGTCA
MA0613.1.FOXG1	14.0369	1	GTAAACAA
MA0847.1.FOXD2	11.6458	1	GTAAACA
MA0095.1.YY1	8.38313	1	GCCATC
MA0056.1.MZF1	9.08528	1	TGGGGA
MA1476.1.DLX5	12.1244	0.999415	GCAATTAT
MA0498.2.MEIS1	10.2828	0.998504	ATGACAG
MA0721.1.UNCX	10.8881	0.998413	TTAATTAA
MA0442.2.SOX10	14.1719	0.997774	AAAACAAAGGA
MA1547.1.PITX2	12.7294	0.997428	CTAATCCC
MA1112.1.NR4A1	14.9181	0.995361	TAAAGGTCAT
MA0719.1.RHOXF1	9.8705	0.994536	CTAATCCC
MA0080.1.SPI1	8.57877	0.994464	GGGAAG
MA0031.1.FOXD1	12.3413	0.994362	GTAAACAA
MA1535.1.NR2C1	11.5577	0.993988	AGAGGTCAT
MA0508.3.PRDM1	15.5089	0.993762	CTCTTTCTCTT
MA0662.1.MIXL1	11.0622	0.993114	GTTAATTAAC
MA0879.2.DLX1	10.6411	0.992842	GCAATTAT
MA0707.2.MNX1	10.6201	0.992072	GCAATTAT
MA1547.2.PITX2	13.2735	0.991666	CTAATCCC
MA0479.1.FOXH1	15.5082	0.990788	CAGAATCCACA
MA1964.1.SMAD2	12.7565	0.990341	GCCCAGACAG
MA0808.1.TEAD3	12.7617	0.989956	ACATTCCT
MA0630.1.SHOX	10.4647	0.989533	TTAATTGA
MA0714.1.PITX3	12.315	0.989389	ACTAATCCC
MA0493.2.KLF1	14.0585	0.989222	GGGGTGGGG
MA1646.1.OSR2	14.595	0.988394	AGACAGAAGCAG
MA0830.1.TCF4	13.0747	0.987392	TGCACCTGCG
MA0716.1.PRRX1	10.9897	0.986713	TTAATTAA
MA1635.1.BHLHE22	12.984	0.985966	GGCAGCTGGG
MA0718.1.RAX	12.364	0.985828	GTTAATTAAC
MA0894.1.HESX1	12.6939	0.985496	GTTAATTAAC
MA0063.2.NKX2-5	13.4046	0.985396	GACACTCAAGT
MA0693.2.VDR	11.2865	0.985314	TGGGTTCA
MA0723.2.VAX2	9.67535	0.985207	TTAATTAA
MA1563.2.SOX18	10.9693	0.985036	AACAATAA
MA0648.1.GSC	12.8069	0.984688	ACTAATCCCC
MA0891.1.GSC2	12.0226	0.984633	ACTAATCCCC
MA0654.1.ISX	11.3575	0.984507	TTAATTAA
MA1577.1.TLX2	11.1806	0.984133	TTAATTAA
MA0867.2.SOX4	13.5986	0.984039	AAACAAAGGA
MA0033.1.FOXL1	8.36123	0.98397	TAAACATA
MA0717.1.RAX2	10.3695	0.983535	TCAATTAA
MA0522.2.TCF3	12.7311	0.983523	TGCACCTGCG
MA1151.1.RORC	14.3639	0.982902	GAAAATAGGTCA
MA1481.1.DRGX	10.8395	0.982789	TTAATTAA
MA1116.1.RBPJ	12.4007	0.982719	CCTGGGAATG
MA0675.1.NKX6-2	10.2317	0.982288	TTAATTAA
MA0143.4.SOX2	13.6266	0.982233	GTACAATGGAA
MA1558.1.SNAI1	13.0975	0.982008	CGCAGGTGCA
MA0644.2.ESX1	11.3439	0.981957	TTAATTAA
MA0710.1.NOTO	12.0982	0.981674	GTTAATTAAC
MA1112.2.NR4A1	14.9057	0.981529	TTAAAGGTCATT
MA0161.2.NFIC	13.4961	0.981374	GTCTTGGCAGA
MA0701.1.LHX9	10.2224	0.981147	TCAATTAA
MA0671.1.NFIX	9.97931	0.980444	TTTGCCAAA
MA0635.1.BARHL2	11.4721	0.980149	CCTAAATGGT
MA0500.2.MYOG	14.21	0.980125	CAGCAGCTGCAC
MA0157.1.FOXO3	11.5491	0.980081	GGTAAACA
MA0674.1.NKX6-1	11.1854	0.979911	TTAATTAA
MA0504.1.NR2C2	20.3267	0.979232	CCGGGTCAGAGGTCA
MA0593.1.FOXP2	15.0036	0.978984	AGGTAAACAAA
MA1100.2.ASCL1	12.7612	0.978903	AGCAGCTGCA
MA1103.2.FOXK2	13.5819	0.978806	AGGTAAACAAA
MA0882.1.DLX6	10.2333	0.978513	GCAATTAT
MA0875.1.BARX1	10.1484	0.978001	ACCATTAG
MA1518.1.LHX1	9.40842	0.977672	GCAATTAT
MA1502.1.HOXB8	10.8027	0.977575	GCAATTAT
MA0878.1.CDX1	12.2511	0.977076	ACAATAAAA
MA0711.1.OTX1	11.1634	0.976968	CTAATCCC
MA0481.3.FOXP1	13.4981	0.976857	AGGTAAACAAA
MA1152.1.SOX15	12.3795	0.976068	CCTTTGTTTT
MA0599.1.KLF5	13.54	0.975501	CCCCCACCCC
MA0712.1.OTX2	11.1424	0.975196	CTAATCCC
MA0670.1.NFIA	11.868	0.974895	TCTGCCAAGA
MA1683.1.FOXA3	13.43	0.97441	AGGTAAACAAA
MA0712.2.OTX2	13.4865	0.974248	TGGGGATTAGTT
MA0902.1.HOXB2	10.1339	0.974225	GTTAATTAAC
MA0775.1.MEIS3	11.0567	0.973896	ATGACAGC
MA0644.1.ESX1	10.9754	0.973726	GTTAATTAAC
MA0745.1.SNAI2	11.3428	0.972772	CGCAGGTGC
MA0039.4.KLF4	14.7789	0.972733	GCCCCCACCCCT
MA1103.1.FOXK2	13.5878	0.972665	AGGTAAACAAA
MA1108.2.MXI1	11.1289	0.971987	CTCACATGCC
MA1498.1.HOXA7	10.2381	0.971794	GCAATTAT
MA0666.2.MSX1	10.9904	0.970809	TCAATTAA
MA0708.2.MSX2	10.8411	0.97068	TCAATTAA
MA1472.1.BHLHA15	12.3149	0.970586	AGCAGCTGTG
MA0886.1.EMX2	11.8373	0.970445	GTTAATTAAC
MA1519.1.LHX5	11.1011	0.970401	TTAATTAA
MA1505.1.HOXC8	9.72007	0.970341	TTAATTAA
MA1504.1.HOXC4	9.63089	0.97021	TTAATTAA
MA1641.1.MYF5	13.9757	0.969911	GGACAGCTGTAG
MA1500.1.HOXB6	9.77318	0.969176	ATAATTGC
MA1507.1.HOXD4	9.83054	0.96909	ACCATTAG
MA0625.2.NFATC3	10.294	0.968637	CTGGAAACA
MA1150.1.RORB	13.3547	0.96853	AAATAGGTCAA
MA0722.1.VAX1	10.1538	0.968345	TTAATTAA
MA0522.3.TCF3	12.7051	0.967704	TGCACCTGCGT
MA1111.1.NR2F2	13.5868	0.967306	TAAAGGTCATT
MA1965.1.SP5	12.6438	0.967246	ACCCTCCCCC
MA0724.1.VENTX	12.0969	0.967001	AACCATTAG
MA1120.1.SOX13	12.4596	0.966837	GTACAATGGAA
MA0056.2.MZF1	14.4026	0.966736	CTAATCCCCAGCC
MA0132.2.PDX1	10.1033	0.966608	TTAATTAA
MA1497.1.HOXA6	10.7946	0.96654	GGCAATTATC
MA1496.1.HOXA4	9.54171	0.966469	ACCATTAG
MA0642.2.EN2	10.3502	0.966259	GGCAATTA
MA0725.1.VSX1	10.5562	0.965655	TTAATTAA
MA0903.1.HOXB3	9.95251	0.965586	GTTAATTAAC
MA0047.3.FOXA2	13.5	0.965441	AGGTAAACAAA
MA1471.1.BARX2	13.3648	0.965285	TTTAACCATTAG
MA0723.1.VAX2	10.2539	0.965142	TTAATTAA
MA0658.1.LHX6	12.6286	0.964769	GTTAATTAAC
MA0075.3.PRRX2	11.199	0.96459	TTAATTAA
MA0809.1.TEAD4	11.4115	0.963898	GACATTCCTG
MA0910.2.HOXD8	10.3597	0.963218	GCAATTAT
MA0465.1.CDX2	13.9653	0.96287	GAACAATAAAA
MA1100.1.ASCL1	15.5409	0.962713	CCAGCAGCTGCAC
MA1498.2.HOXA7	9.23247	0.962612	GCAATTAT
MA1574.1.THRB	18.8304	0.962589	CGGGTCAGAGGTCAT
MA0666.1.MSX1	10.2118	0.962379	TCAATTAA
MA0707.1.MNX1	11.0411	0.962181	GTTAATTAAC
MA0103.3.ZEB1	12.1979	0.962148	TGCACCTGCGT
MA0876.1.BSX	9.22093	0.96179	TCAATTAA
MA0158.1.HOXA5	8.76233	0.961478	CGTTAATT
MA1540.1.NR5A1	12.9976	0.961412	TTCAAGGCCAG
MA0774.1.MEIS2	11.676	0.961364	ATGACAGC
MA1499.1.HOXB4	10.0657	0.961306	ACCATTAG
MA1511.2.KLF10	13.9127	0.961237	GGGGTGGGG
MA1648.1.TCF12	12.3257	0.960989	TGCACCTGCGT
MA0877.3.BARHL1	11.5149	0.960745	GCCGTTTA
MA0032.1.FOXC1	6.76378	0.960406	ACTGAGTA
MA0699.1.LBX2	10.4602	0.96022	GTTAATTAAC
MA1986.1.ZNF692	12.7402	0.959911	AGGGCCCAGA
MA0890.1.GBX2	11.0564	0.959792	GGCAATTATC
MA1959.1.KLF7	12.7583	0.958907	GGGGTGGGG
MA0481.1.FOXP1	17.5531	0.958868	AAAATGAAAACAAAG
MA0673.1.NKX2-8	10.4136	0.958842	CTACTTGAG
MA0900.1.HOXA2	10.0941	0.958645	GTTAATTAAC
MA0027.2.EN1	9.94502	0.957677	TTAATTAA
MA0701.2.LHX9	10.8166	0.957508	TTAATTAA
MA1110.1.NR1H4	13.5456	0.957375	TAAATGACCTT
MA1495.1.HOXA1	9.16334	0.957283	TTAATTAA
MA0612.1.EMX1	10.4652	0.957164	GTTAATTAAC
MA0868.2.SOX8	12.6656	0.957069	AGAACAATAA
MA0700.1.LHX2	11.5258	0.956975	GTTAATTAAC
MA0084.1.SRY	10.374	0.95688	GTAAACAAA
MA0726.1.VSX2	10.8577	0.956295	TTAATTAA
MA0764.2.ETV4	12.0532	0.9558	AAAGGAAGGG
MA1559.1.SNAI3	13.5448	0.955631	CGCAGGTGCA
MA0048.2.NHLH1	14.0809	0.953696	CACAGCTGCT
MA0481.2.FOXP1	13.6889	0.953685	AGGTAAACAAAC
MA0003.1.TFAP2A	8.96793	0.953535	GCCCCCAGC
MA0471.1.E2F6	13.0479	0.953527	AGGAGGGAGAG
MA1534.1.NR1I3	11.4782	0.952752	ATGAACTAA
MA1601.1.ZNF75D	13.3741	0.952231	GGGTGGGAGA
MA0900.2.HOXA2	9.63197	0.95207	TTAATTAA
MA0517.1.STAT1::STAT2	18.6054	0.951194	TAGGTTTCATTTCCC
MA0612.2.EMX1	9.98547	0.950976	TTAATTAA
MA0914.1.ISL2	10.1272	0.950968	CCACTTAG
MA0902.2.HOXB2	9.10528	0.950313	TTAATTAA
MA0703.2.LMX1B	14.1344	0.950207	TAGTTAATTAA
MA0893.2.GSX2	8.88951	0.949915	GCAATTAT
MA0708.1.MSX2	10.4329	0.94974	TCAATTAA
MA0079.3.SP1	13.3443	0.949027	CCCCCACCCCT
MA0071.1.RORA	12.5175	0.948985	TTAAAGGTCA
MA0895.1.HMBOX1	11.4959	0.948876	ATTAGTTAAT
MA1523.1.MSANTD3	11.8827	0.948777	GGACACTCAA
MA0740.2.KLF14	12.5686	0.948747	GGGGTGGGG
MA1537.1.NR2F1	18.9715	0.948694	CGGGTCAGAGGTCAT
MA0122.2.NKX3-2	11.4094	0.946944	TCCACTTAG
MA0039.3.KLF4	12.9629	0.946163	CAACACCCTCC
MA0887.1.EVX1	9.81292	0.945892	GGCAATTATC
MA1602.1.ZSCAN29	14.5007	0.945605	AGTCTACACAGA
MA1463.1.ARGFX	12.3405	0.945395	GTTAATTAAC
MA1961.1.PATZ1	14.7437	0.945003	GAGGGGTGGGGG
MA0642.1.EN2	10.0124	0.942358	GTCAATTAAG
MA0158.2.HOXA5	9.25901	0.942305	GTCATGAG
MA0847.3.FOXD2	14.4314	0.94224	GGTAAACAAACA
MA1581.1.ZBTB6	14.0576	0.941619	GACCTGGAGCCAG
MA0628.1.POU6F1	11.6767	0.940775	GTTAATTAAC
MA1501.1.HOXB7	11.3193	0.940731	GTTAATTAAC
MA0893.1.GSX2	9.4481	0.940269	GTTAATTAAC
MA0888.1.EVX2	9.53373	0.940234	GTTAATTAAC
MA0889.1.GBX1	10.64	0.940233	GTTAATTAAC
MA0018.2.CREB1	9.92666	0.939871	TGACGTCT
MA0899.1.HOXA10	11.7198	0.939232	AACAATAAAAT
MA0154.2.EBF1	11.5459	0.939085	CCCTCCTGAGA
MA0913.2.HOXD9	11.7599	0.939012	ACAATAAAAT
MA0830.2.TCF4	13.1954	0.938753	CTGCACCTGCGTA
MA0810.1.TFAP2A	11.9373	0.938235	AGCCCCCAGCCA
MA0892.1.GSX1	9.00411	0.93809	GTTAATTAAC
MA0856.1.RXRG	17.9936	0.937937	CGGGTCAGAGGTCA
MA0032.2.FOXC1	12.274	0.937736	TTTGTAAATAA
MA0846.1.FOXC2	13.0771	0.937556	AATGAAAACAAA
MA0650.1.HOXA13	12.3233	0.937452	ACAATAAAAT
MA0634.1.ALX3	10.005	0.937312	GTTAATTAAC
MA1563.1.SOX18	8.02103	0.937308	AACGATGG
MA0030.1.FOXF2	14.8154	0.937266	TACAGGTAAACAAA
MA1121.1.TEAD2	13.4913	0.937105	GGACATTCCTGGC
MA0904.2.HOXB5	8.77765	0.93672	GTCATGAG
MA0484.1.HNF4G	14.5459	0.936702	CGGGGGCAAAGTCTA
MA0672.1.NKX2-3	10.5109	0.93658	ACCACTTCTA
MA0668.1.NEUROD2	10.4914	0.936212	GCCATACGGA
MA1710.1.ZNF257	12.9798	0.935137	TGGAGGCAGGAG
MA0079.1.SP1	9.96988	0.934628	GGGGGAGGGT
MA0528.2.ZNF263	13.5533	0.934387	GCAGGGAGGATG
MA1550.1.PPARD	17.981	0.934261	CCGGGTCAGAGGTCAT
MA0766.1.GATA5	8.70684	0.934207	AGATTACA
MA0090.2.TEAD1	10.2824	0.933983	GACATTCCTG
MA0706.1.MEOX2	9.67745	0.933244	GTTAATTAAC
MA0160.1.NR4A2	9.73828	0.933227	AAGGACAC
MA0077.1.SOX9	10.6641	0.933136	CCATTGTAC
MA0597.1.THAP1	8.65284	0.932452	TTTCCCGCA
MA0852.2.FOXK1	13.6822	0.932328	CAGGTAAACAAACA
MA0901.1.HOXB13	12.1236	0.931432	ACAATAAAAT
MA0152.1.NFATC2	9.49015	0.931047	TTTTCCT
MA0099.2.FOS::JUN	8.77298	0.930975	TGACACA
MA0090.3.TEAD1	13.7129	0.930661	GGACATTCCTGGC
MA0845.1.FOXB1	13.0916	0.930306	TTTGTAAATAA
MA0017.1.NR2F1	14.7719	0.929827	TGACCTCTGACCCG
MA0865.2.E2F8	13.7664	0.929776	TTCCCGCAAAAA
MA0144.2.STAT3	10.8845	0.929415	CTTTTAGGAAA
MA0865.1.E2F8	17.647	0.928354	TTTCCCGCAAAA
MA0103.2.ZEB1	10.768	0.928224	CTGCACCTG
MA0526.1.USF2	11.4074	0.928211	CTCATGTGCCC
MA0072.1.RORA	14.9436	0.927692	AGAAAATAGGTCAA
MA1568.1.TCF21	12.4535	0.92744	CTCCGTATGGCA
MA1515.1.KLF2	11.1728	0.927201	GCCCCCACCCC
MA0809.2.TEAD4	12.4306	0.926934	TGACATTCCTGT
MA0465.2.CDX2	13.0559	0.926849	GAACAATAAAAT
MA0017.2.NR2F1	13.0161	0.926718	CAGAGGTCATGTA
MA2003.1.NKX2-4	10.0369	0.926323	CCACTTCTAA
MA0661.1.MEOX1	9.73696	0.926226	GGCAATTATC
MA0466.1.CEBPB	10.0932	0.925738	GATTTCCTCAT
MA0024.1.E2F1	10.4439	0.925719	TTTCCCGC
MA1631.1.ASCL1	12.6675	0.925568	CTGCACCTGCGTA
MA1979.1.ZNF416	13.691	0.925311	TGTCTGGGCCC
MA1125.1.ZNF384	11.9665	0.924939	GCTGAAAAAATA
MA0028.1.ELK1	9.40914	0.924925	CCCCCGGAAA
MA0068.2.PAX4	10.0132	0.923927	TTAATTAA
MA1473.1.CDX4	11.5473	0.92386	AACAATAAAAT
MA0909.1.HOXD13	11.1892	0.92354	ACAATAAAAT
MA0162.2.EGR1	13.2971	0.922581	TACCCTCCCCCACA
MA0738.1.HIC2	8.69668	0.922239	CTGCCCAGC
MA0871.1.TFEC	10.5514	0.921967	GGCACATGAG
MA1525.1.NFATC4	10.1328	0.921617	AGTGGAACGT
MA0080.2.SPI1	9.15613	0.920475	AGGAAAT
MA0811.1.TFAP2B	11.3473	0.920314	AGCCCCCAGCCA
MA1548.1.PLAGL2	11.0053	0.918707	GTGGCCCCCA
MA0820.1.FIGLA	10.1668	0.918676	TACAGCTGTC
MA0855.1.RXRB	17.3465	0.91867	CGGGTCAGAGGTCA
MA1530.1.NKX6-3	8.65719	0.917855	GCCATTGTA
MA0114.2.HNF4A	13.7115	0.917384	ATAGACTTTGCCCCC
MA1480.1.DPRX	10.8862	0.917165	AACTAATCCC
MA0746.1.SP3	11.6014	0.91694	CCCCCACCCCT
MA0156.1.FEV	9.66612	0.916754	CGGGAAAT
MA1522.1.MAZ	11.1176	0.916555	ATCCCCTCCAT
MA1968.1.TFCP2	11.421	0.916107	CAACCAGTTT
MA1467.1.ATOH1	11.5125	0.916049	CACAGCTGCT
MA1508.1.IKZF1	12.5738	0.915339	GAAAAAGGAAGG
MA1570.1.TFAP4	9.30037	0.915143	CTCATGTGTC
MA1542.1.OSR1	10.3055	0.915138	TGCTTCTGTC
MA0793.1.POU6F2	10.993	0.914942	AGTTAATTAA
MA1630.2.ZNF281	13.5304	0.914129	GGGGGAGGGTAG
MA0037.3.GATA3	8.36053	0.913451	AGATAGGG
MA0524.2.TFAP2C	11.0287	0.913396	AGCCCCCAGCCA
MA1525.2.NFATC4	9.79011	0.913153	GCTGGAAACA
MA0148.3.FOXA1	10.8352	0.912333	GTTGTGTGTACTCAG
MA0878.2.CDX1	10.9796	0.912229	AACAATAAAAT
MA1105.2.GRHL2	12.6298	0.912027	AAAACTGGTTGC
MA0692.1.TFEB	10.3962	0.910898	CTCACATGCC
MA0137.1.STAT1	15.4157	0.910762	GGGAAATGAAACCT
MA0831.1.TFE3	9.72327	0.910447	CTCACATGCC
MA0901.2.HOXB13	13.55	0.910389	GAACAATAAAATGG
MA0912.2.HOXD3	8.57386	0.910313	TTAATTAA
MA0650.2.HOXA13	12.1027	0.910151	AACAATAAAAT
MA0148.4.FOXA1	11.961	0.909813	AGGTAAACAAAC
MA0713.1.PHOX2A	11.8889	0.909504	TAATTTAATTC
MA0148.1.FOXA1	11.1233	0.909418	TGTTTTCATTT
MA0148.2.FOXA1	11.0778	0.909229	TGTGTACTCAG
MA1579.1.ZBTB26	11.5762	0.908902	TACTCCAGATAGTTC
MA0700.2.LHX2	10.0968	0.908784	GGGCAATTATC
MA1647.1.PRDM4	10.6511	0.908539	AGCAGTTTCTG
MA0758.1.E2F7	17.5109	0.908444	ATTTCCCGCAAAAA
MA1707.1.DMRTA1	11.514	0.908078	AATGGTTACAAA
MA1554.1.RFX7	8.69628	0.907758	GGTTGCTGA
MA1578.1.VEZF1	9.71588	0.907225	GCCCCCACCC
MA1511.1.KLF10	10.6676	0.906518	CCCCCACCCCT
MA0814.1.TFAP2C	9.85402	0.905911	AGGCTGAGGCT
MA0715.1.PROP1	12.9999	0.905802	GAATTAAATTA
MA0050.1.IRF1	13.0465	0.905628	GGAAATGAAACC
MA0499.2.MYOD1	11.6879	0.90536	CTACAGCTGTCCA
MA1478.1.DMRTA2	11.0084	0.905318	AATGGTTACAAA
MA0753.1.ZNF740	11.5978	0.905307	CCTCCCCCAC
MA1947.1.ETV5::FOXO1	12.6571	0.905121	ATCAACAGGAATG
MA0847.2.FOXD2	10.9486	0.90505	GGTAAACAAACAT
MA0618.1.LBX1	8.5219	0.904971	TTAATTAA
MA0155.1.INSM1	12.4314	0.904769	TGTCAGAGGGCA
MA1645.1.NKX2-2	11.4531	0.90384	AGGACACTCAAGTA
MA0042.1.FOXI1	11.0883	0.903469	CAATGTTTGTTT
MA0878.3.CDX1	10.2279	0.903236	AACAATAAAA
MA0506.1.NRF1	10.1375	0.902183	GCCCCTGCCCA
MA0048.1.NHLH1	12.6056	0.901834	CCACAGCTGCTT
MA0041.2.FOXD3	14.6924	0.901385	CAGGTAAACAAACATT
MA1708.1.ETV7	10.1587	0.901135	TGCGGGAAATG
MA0105.3.NFKB1	10.4225	0.901023	AGGCCTTTCCC
MA0866.1.SOX21	15.0434	0.900718	AACCATTTTATTGTT
MA0018.4.CREB1	11.6318	0.900674	GAGTGATGACAGC
MA0769.2.TCF7	9.9823	0.900652	TCCTTTGACTT
MA1587.1.ZNF135	15.3195	0.90063	CCTTGAACTCCTGA
MA0646.1.GCM1	11.0899	0.900525	TCTGCTGGTAC
MA1487.1.FOXE1	13.6532	0.90043	AGGTAAACAAACATT
MA1562.1.SOX14	11.7959	0.900164	ACGTACAATG
MA0744.2.SCRT2	13.8469	0.899946	ACACCAACAGGTAAAT
MA1105.1.GRHL2	13.5694	0.899939	CAGCAACCAGTTTTT
MA0079.2.SP1	10.6492	0.899487	CCCATCCTCC
MA0137.3.STAT1	10.166	0.899324	TTTGCGGGAAA
MA0496.1.MAFK	11.2353	0.898862	TTTTTTCAGCACTAT
MA0141.3.ESRRB	11.9053	0.898836	TAAAGGTCATT
MA0691.1.TFAP4	10.5893	0.89871	TACAGCTGTC
MA0594.2.HOXA9	7.46927	0.898671	CTCATAATTT
MA0003.3.TFAP2A	9.14752	0.898597	AGGCTGAGGCT
MA0842.1.NRL	9.12231	0.897775	ATAGTGCTGAA
MA1517.1.KLF6	9.76936	0.897271	GCCCCCACCCC
MA0831.2.TFE3	8.68253	0.89694	CTTGTGAT
MA0801.1.MGA	8.50531	0.896885	TAGTGTGA
MA1566.1.TBX3	8.29016	0.896842	TTGGTGTGGA
MA0475.1.FLI1	10.3161	0.896786	AAAGGAAGGGA
MA1520.1.MAF	14.5578	0.895767	TTGCTTGCTCAGCAA
MA0818.2.BHLHE22	8.87052	0.895465	TCCGTATGGC
MA0905.1.HOXC10	8.50281	0.89466	GTCATTTAAA
MA1487.2.FOXE1	12.3874	0.893821	GGTAAACAAACATT
MA1720.1.ZNF85	14.9064	0.893355	ATGGAGATTACATCCA
MA0685.2.SP4	9.49236	0.89328	GGGGTGGGG
MA0632.2.TCFL5	7.95369	0.892927	TCATGTGCCC
MA0841.1.NFE2	9.45738	0.892486	AAGGACTCATC
MA0058.2.MAX	8.31123	0.891808	ACTCACATGC
MA0741.1.KLF16	11.0476	0.89154	CCCCCACCCCT
MA0524.1.TFAP2C	10.0962	0.891046	AACTGCTTCAGGACA
MA1639.1.MEIS1	11.0618	0.890928	GTCATCACTCACC
MA0625.1.NFATC3	9.12865	0.890926	TGTTTCCAGC
MA0095.2.YY1	11.3751	0.889917	AAACATGGCTGG
MA0079.5.SP1	9.81188	0.889386	GGGGTGGGG
MA1593.1.ZNF317	11.6708	0.888702	TACCAGCAGAAT
MA1149.1.RARA::RXRG	13.7823	0.888612	AGGGGCAGTCACAGGTCA
MA0502.2.NFYB	11.5036	0.888355	AACATTGGCCCA
MA0491.1.JUND	6.83459	0.8881	AAGGACTCATC
MA0745.2.SNAI2	10.431	0.88797	CTGCACCTGCGTA
MA0093.2.USF1	8.7328	0.887894	GCCTTGTGATC
MA1549.1.POU6F1	8.12018	0.887674	TCAATGAGGC
MA1521.1.MAFA	13.6484	0.887446	TTGCTTGCTCAGCAA
MA1984.1.ZNF667	11.9762	0.88739	TTAAAAGCCCCG
MA0105.1.NFKB1	10.3964	0.887329	GGGGCTGTCC
MA0742.2.KLF12	9.58154	0.886388	GGGGTGGGG
MA1567.1.TBX6	8.50123	0.885858	AGGGTGTTGA
MA0136.2.ELF5	9.22441	0.885808	ATGAGGAAATC
MA0488.1.JUN	9.00521	0.885797	CACATGAGGAAAT
MA0516.3.SP2	9.24765	0.885455	GGGGTGGGG
MA0667.1.MYF6	10.7145	0.885238	TACAGCTGTC
MA0665.1.MSC	11.5273	0.885002	TACAGCTGTC
MA0484.2.HNF4G	11.7694	0.884946	GGCAAAGTCTATC
MA1524.1.MSGN1	7.96541	0.884927	AATCAAATGTGA
MA0610.1.DMRT3	10.0628	0.884795	TGTGTATCACT
MA1122.1.TFDP1	9.92993	0.884676	TTGCGGGAAAT
MA0655.1.JDP2	9.54586	0.884517	AGGACTCAT
MA0114.4.HNF4A	11.8995	0.884237	AACAAAGGCCAAG
MA0806.1.TBX4	7.91035	0.884216	ATGTGTCA
MA0090.1.TEAD1	11.5167	0.884102	GACATTCCTGTT
MA0825.1.MNT	8.36941	0.883525	AACACGGGCT
MA1148.1.PPARA::RXRA	15.1775	0.883098	GTCCGGGTCAGAGGTCAT
MA0473.1.ELF1	9.86807	0.882448	GAAAAAGGAAGGG
MA0002.1.RUNX1	9.76656	0.882403	TTTTGTGGCAA
MA1557.1.SMAD5	9.4528	0.882358	CGTCTTGACA
MA1980.1.ZNF418	14.2484	0.882266	GAGAAGCTAAAAGGA
MA0795.1.SMAD3	10.005	0.881453	CGTCTTGACA
MA1561.1.SOX12	11.6189	0.881396	CCAGAACAATA
MA0592.1.ESRRA	11.0749	0.880971	TAAAGGTCATT
MA0771.1.HSF4	10.9369	0.880049	CTCCAGATAGTTC
MA0766.2.GATA5	6.14739	0.879951	GAGATTACAT
MA1512.1.KLF11	9.29908	0.879808	CCCCCACCCCT
MA0137.2.STAT1	12.2721	0.879756	CATTTCCCGCAAAAA
MA0743.2.SCRT1	12.4689	0.879107	ACACCAACAGGTAAAT
MA0792.1.POU5F1B	8.91271	0.879056	CATTTAAAT
MA0812.1.TFAP2B	8.48695	0.878844	AGCCTCAGCCT
MA0477.1.FOSL1	7.93409	0.878733	GGTGAGTGATG
MA1943.1.ETV2::HOXB13	11.7314	0.87869	ACCAGAACAATAAAA
MA0592.3.ESRRA	11.4915	0.878255	CTTAAAGGTCATT
MA1142.1.FOSL1::JUND	8.57909	0.878046	AAGGACTCAT
MA0035.4.GATA1	9.06673	0.877935	ATCTAAACTAC
MA1633.2.BACH1	7.82217	0.877741	AGGACTCAT
MA0102.3.CEBPA	6.65369	0.877701	ATTTCCTCATG
MA1954.1.FOXO1::ELK1	12.2109	0.877401	ATCAACAGGAATGT
MA1653.1.ZNF148	11.685	0.8774	CTACCCTCCCCC
MA0681.2.PHOX2B	14.317	0.877196	CAGAATTAAATTATGA
MA0464.2.BHLHE40	7.75791	0.87678	CTCACATGCC
MA1509.1.IRF6	8.86986	0.876478	ACAGAAACT
MA1132.1.JUN::JUNB	9.27635	0.876103	AAGGACTCAT
MA0767.1.GCM2	9.04694	0.876087	CATGCGGGGC
MA1468.1.ATOH7	7.86285	0.875758	TCCGTATGGC
MA1560.1.SOHLH2	9.17137	0.875369	CGCAGGTGCA
MA0607.2.BHLHA15	8.16214	0.875291	GCCATACGGA
MA1601.2.ZNF75D	12.3919	0.875151	GAGGGAGAGCCT
MA1109.1.NEUROD1	9.895	0.875038	GGGCAGCTGGGGA
MA0647.1.GRHL1	10.9966	0.875021	AAAACTGGTTGC
MA0024.2.E2F1	7.10589	0.874928	TGGGTGGGAGA
MA0510.1.RFX5	8.82861	0.874836	TACAATGGCCACTGA
MA0036.2.GATA2	9.0235	0.874621	TTGTTTCTATCTCA
MA1729.1.ZNF680	13.3699	0.873833	GGAAAAGAAGACTCA
MA1936.1.ERF::FOXO1	10.7233	0.873583	ATCAACAGGAATGT
MA0598.3.EHF	11.9712	0.873183	ATCCCTTCCTTTTTC
MA0476.1.FOS	6.31054	0.873103	TCTGCCTCATT
MA1099.2.HES1	6.4646	0.873042	GGCATGTGAG
MA0093.1.USF1	7.79957	0.872968	CATGTGA
MA1728.1.ZNF549	10.2638	0.872897	ACTGCAGCCCTC
MA0805.1.TBX1	7.80313	0.872774	TAGTGTGA
MA0037.2.GATA3	6.5876	0.872654	ACATAAGA
MA1938.1.ERF::NHLH1	15.5647	0.872268	TGCAGCTGCTGGAAACA
MA1655.1.ZNF341	9.98587	0.871831	GAGCACAGCCCT
MA1972.1.ZFP14	11.8957	0.871587	GGAGAATCAGGAGTT
MA1564.1.SP9	10.0413	0.871442	CCCCCACCCCTC
MA0083.2.SRF	12.6748	0.871327	CAATTCCAAACATGGCTG
MA0814.2.TFAP2C	10.807	0.870569	CAGGCTGAGGCTGT
MA0462.1.BATF::JUN	6.54782	0.870333	TAAATGTGTCA
MA0489.1.JUN	8.16873	0.870051	AAAAGAAGACTCAC
MA1569.1.TFAP2E	5.09167	0.869564	TGCCCCTGGCT
MA0765.2.ETV5	9.02816	0.869486	GCACTTCCATT
MA0101.1.REL	8.69441	0.869123	GGGGCTGTCC
MA1479.1.DMRTC2	10.7681	0.868899	AATGGTTACAAA
MA0764.1.ETV4	8.34784	0.868648	CCCGGAAAGA
MA0106.2.TP53	12.6959	0.868507	GCAATTCCAAACATG
MA1583.1.ZFP57	8.22141	0.868393	GACTTGCCACAAA
MA1592.1.ZNF274	8.93177	0.868319	CTTATGTGTCCTTATA
MA0819.1.CLOCK	8.83333	0.868239	AACACGGGCT
MA1642.1.NEUROG2	8.70149	0.867939	GGGGCAGCTGGGG
MA0466.2.CEBPB	6.11802	0.867686	CTTACTAAAT
MA0490.1.JUNB	6.00921	0.867581	TGATGAGTCCT
MA1491.1.GLI3	10.458	0.867521	AGCCCACCCATACAC
MA0003.2.TFAP2A	10.7583	0.867436	AACTGCTTCAGGACA
MA0478.1.FOSL2	6.8187	0.867427	TGATGAGTCCT
MA0093.3.USF1	10.8023	0.867125	GTGGCATGTGAGTC
MA1950.1.FLI1::FOXI1	11.4353	0.86707	ATCAACAGGAATGT
MA1638.1.HAND2	5.75819	0.86706	TCCAGATAGT
MA0687.1.SPIC	12.0861	0.866645	TAAAAGGGGAAATT
MA1955.1.FOXO1::ELK3	12.4502	0.866578	ATCAACAGGAATGT
MA1928.1.BNC2	9.16861	0.866272	ATGTGAGTCTTC
MA0807.1.TBX5	7.67857	0.866236	ATGTGTCA
MA0526.3.USF2	10.7996	0.866212	GTGGCATGTGAGTC
MA0470.1.E2F4	7.66172	0.866142	GGGTGGGAGAG
MA0645.1.ETV6	8.0496	0.865836	AATGGAAGTG
MA0099.3.FOS::JUN	8.64529	0.865316	ATGTGTCAGA
MA0036.3.GATA2	7.88294	0.865077	TTCTTATGTGT
MA0827.1.OLIG3	7.29862	0.864986	GCCATACGGA
MA0154.4.EBF1	11.8825	0.864862	CATTCCCAGGGAGAA
MA1977.1.ZNF324	14.7471	0.864591	CACTGGGAGGTAAGGATGGCA
MA1580.1.ZBTB32	7.93856	0.86448	AGTGCAGTAT
MA0038.2.GFI1	7.31175	0.864392	AAAATCAAGGTC
MA1483.2.ELF2	7.85726	0.863881	CCCCCGGAAAGA
MA0475.2.FLI1	6.57466	0.863753	CCCGGAAAGA
MA0516.1.SP2	10.2654	0.863346	CCCCCACCCCTCAAG
MA1117.1.RELB	9.21576	0.863097	AATTTCCCCTT
MA0765.1.ETV5	7.31897	0.86306	CCCGGAAAGA
MA1730.1.ZNF708	11.9795	0.86304	GCAGCTGCACCTGCG
MA1102.2.CTCFL	9.72275	0.863028	CCCAGGGAGCAC
MA0780.1.PAX3	8.20919	0.86286	TAATTAACTA
MA0491.2.JUND	9.01454	0.8622	AAAGGACTCATCA
MA0837.1.CEBPE	6.89858	0.862093	CTTACTAAAT
MA1123.1.TWIST1	8.89451	0.861989	ACTACAGCTGTCC
MA1948.1.ETV5::HOXA2	11.3368	0.861984	AGTGGATGTAATCT
MA0819.2.CLOCK	7.03132	0.861757	GAACACGGGC
MA0761.2.ETV1	10.6267	0.861735	AAAAAGGAAGGGAT
MA1657.1.ZNF652	10.4355	0.861128	CTAATGGTTAAA
MA0156.2.FEV	7.31204	0.860969	CCCGGAAAGA
MA0746.2.SP3	8.70151	0.860894	GCCCCCACCCCTC
MA1636.1.CEBPG	10.638	0.860872	ACATGAGGAAATCTC
MA1971.1.ZBED2	9.1182	0.860842	GAAATGAAACCTAG
MA1115.1.POU5F1	8.74903	0.860833	AAATGAAAACA
MA1649.1.ZBTB12	8.36295	0.860787	AGCTGGAATCC
MA1656.1.ZNF449	10.8446	0.860675	CCCTGCCCAGCCAT
MA1107.1.KLF9	10.8391	0.860625	ATACACACACACT
MA0140.2.GATA1::TAL1	10.3876	0.859927	GTAATCTCCATCGTTCAG
MA0058.3.MAX	6.72683	0.859906	CTCACATGCC
MA1725.1.ZNF189	10.4935	0.859547	ATTGCCGTTCCTC
MA0076.2.ELK4	7.62301	0.859446	TTCTTTCCGGG
MA0018.3.CREB1	9.53135	0.858803	TCTGACGTCTTG
MA0833.2.ATF4	9.5319	0.858605	ACATGAGGAAATCT
MA0490.2.JUNB	9.06939	0.858505	AAAGGACTCATCA
MA1106.1.HIF1A	7.06278	0.85842	AGACGTACAA
MA0748.2.YY2	9.0265	0.858244	AGATGGAGGCA
MA1585.1.ZKSCAN1	8.03018	0.857948	GGAGTAGGTT
MA0052.2.MEF2A	9.65848	0.85788	CTCCAAAGATAGACT
MA0471.2.E2F6	9.52827	0.857853	TCAGGAGGGAGAG
MA0062.3.GABPA	10.9743	0.85781	ATCCCTTCCTTTTT
MA0098.3.ETS1	7.39426	0.857601	CCCGGAAAGA
MA0081.2.SPIB	12.9849	0.857543	AATCCCTTCCTTTTTC
MA0477.2.FOSL1	8.34172	0.857152	AAAGGACTCATCA
MA0862.1.GMEB2	7.25774	0.856743	AGACGTAC
MA0763.1.ETV3	8.91208	0.856575	AATGGAAGTG
MA0761.1.ETV1	7.64513	0.856395	CCCGGAAAGA
MA0080.4.SPI1	10.5743	0.856315	TAAAAGGGGAAATT
MA1503.1.HOXB9	7.37715	0.856239	TTCGTAAATT
MA0756.2.ONECUT2	6.2003	0.856078	AGATCAACA
MA0468.1.DUX4	4.62677	0.856063	TAAGAGAATCA
MA1138.1.FOSL2::JUNB	7.91536	0.855685	GATGAGTCCT
MA1123.2.TWIST1	8.66571	0.855636	ACTACAGCTGTCC
MA1135.1.FOSB::JUNB	7.87447	0.855507	GATGAGTCCT
MA1130.1.FOSL2::JUN	8.30543	0.855345	TGATGAGTCCTT
MA1143.1.FOSL1::JUND	8.39115	0.855286	CTGACGTCTT
MA1144.1.FOSL2::JUND	8.02112	0.855057	GATGAGTCCT
MA0474.2.ERG	6.85453	0.855004	CCCGGAAAGA
MA1133.1.JUN::JUNB	10.182	0.854937	TCTGACGTCTTG
MA0523.1.TCF7L2	8.12435	0.854717	GGAGTTCAAGGCCA
MA1953.1.FOXO1::ELF1	11.2435	0.854714	ATCAACAGGAATGT
MA1935.1.ERF::FOXI1	9.92876	0.854516	CGAAAAAGGAAGGG
MA0686.1.SPDEF	7.63326	0.854512	ACCCGGACCCA
MA0747.1.SP8	9.45157	0.854461	ACCTCTCCCACC
MA0485.2.HOXC9	5.74494	0.854272	TTCGTAAATT
MA1652.1.ZKSCAN5	10.2659	0.854207	CAAGGTAGTGAGAG
MA1541.1.NR6A1	12.9389	0.8542	CAGGAGTTCAAGGCCAG
MA0651.1.HOXC11	7.52398	0.854161	GGTCATTTAAA
MA0678.1.OLIG2	7.09243	0.853345	GCCATACGGA
MA0698.1.ZBTB18	7.89672	0.853117	GAAGCAGCTGTGG
MA0495.1.MAFF	10.4455	0.852882	GCTTGCTCAGCAAGCACT
MA1970.1.TRPS1	9.24357	0.852854	ATTCTTATGTGT
MA1155.1.ZSCAN4	11.9638	0.852648	CACACACACTCACAC
MA0842.2.NRL	7.40898	0.852621	TATAGTGCTGAAA
MA1934.1.ERF::FIGLA	8.61519	0.852526	GAAAGAAGCAGCTGTG
MA0159.1.RARA::RXRA	12.786	0.852466	GGGGCAGTCACAGGTCA
MA0497.1.MEF2C	8.8759	0.852289	TATCTCAAAATGAAA
MA0525.1.TP63	10.6653	0.851959	GCCCCTGCCCAGCCATGTTT
MA1104.1.GATA6	8.29482	0.851534	GACACATAAGAAT
MA1727.1.ZNF417	9.6135	0.851251	AGGGGTGGGGGCCAC
MA0486.1.HSF1	11.453	0.850245	ACTCCAGATAGTTCT

## Sheet: ieCTNNB1
Predicted TFs of gieCTNNB1	Score	Relative score	Predicted sequence
MA0130.1.ZNF354C	8.91578	1	ATCCAC
MA0099.2.FOS::JUN	10.664	1	TGACTCA
MA0080.2.SPI1	11.5428	1	AGGAAGT
MA1633.2.BACH1	16.6242	1	ATGACTCAT
MA0612.1.EMX1	11.9897	1	CCTAATTACC
MA0036.1.GATA2	6.65143	1	GGATA
MA0156.1.FEV	12.0467	1	CAGGAAAT
MA0719.1.RHOXF1	10.154	1	ATAATCCC
MA1481.1.DRGX	11.7016	1	CTAATTAC
MA0161.1.NFIC	9.69743	1	TTGGCA
MA0900.1.HOXA2	11.9233	1	CCTAATTACC
MA0900.2.HOXA2	12.6164	1	GTAATTAG
MA1152.1.SOX15	13.4453	1	CTATTGTTTT
MA0037.3.GATA3	12.1243	1	AGATAAGA
MA0766.1.GATA5	11.2941	1	AGATAAGA
MA0081.1.SPIB	10.4696	1	AGAGGAA
MA0806.1.TBX4	13.6527	1	AGGTGTGA
MA0805.1.TBX1	15.051	1	AGGTGTGA
MA0723.2.VAX2	10.3362	1	GTAATTAG
MA0722.1.VAX1	11.2689	1	CTAATTAC
MA0878.1.CDX1	13.3775	1	GCAATAAAA
MA0152.1.NFATC2	11.3597	1	TTTTCCA
MA0803.1.TBX15	15.2832	1	AGGTGTGA
MA0691.1.TFAP4	16.8761	1	AACAGCTGAT
MA0902.2.HOXB2	11.7469	1	GTAATTAG
MA0801.1.MGA	14.1738	1	AGGTGTGA
MA0723.1.VAX2	11.5725	1	CTAATTAC
MA0912.2.HOXD3	14.1382	1	CTAATTAC
MA0442.1.SOX10	8.90979	1	CTTTGT
MA0037.2.GATA3	14.681	1	AGATAAGA
MA0132.2.PDX1	11.7726	1	GTAATTAG
MA0893.2.GSX2	11.4302	1	GTAATTAG
MA1547.1.PITX2	12.8613	1	ATAATCCC
MA0655.1.JDP2	16.7236	1	ATGACTCAT
MA0807.1.TBX5	12.8551	1	AGGTGTGA
MA0056.1.MZF1	9.08528	1	TGGGGA
MA1536.1.NR2C2	10.2124	0.999707	GAGGTCAA
MA0598.1.EHF	13.7593	0.998789	ACTTCCTC
MA0867.2.SOX4	14.4017	0.998411	GAACAAAGGA
MA0904.2.HOXB5	11.8553	0.998241	GTAATTAG
MA1142.1.FOSL1::JUND	13.0369	0.998057	AATGACTCAT
MA0725.1.VSX1	11.7089	0.998047	CTAATTAC
MA0745.1.SNAI2	12.5855	0.997561	GACAGGTGC
MA0612.2.EMX1	12.5057	0.997099	GTAATTAG
MA1563.2.SOX18	11.4906	0.996439	AACAATAC
MA1495.1.HOXA1	11.152	0.995284	CTAATTAC
MA0080.1.SPI1	8.57877	0.994464	GGGAAG
MA0882.1.DLX6	10.8459	0.994396	CTAATTAC
MA1507.1.HOXD4	11.0353	0.993717	GTAATTAG
MA0148.1.FOXA1	15.9739	0.993665	TGTTTGCTTTG
MA0148.2.FOXA1	15.9986	0.993641	TGTTTGCTTTG
MA1125.1.ZNF384	16.4481	0.993533	TTAAAAAAAAAA
MA0036.3.GATA2	14.1367	0.993423	TTCTTATCTTC
MA0644.2.ESX1	11.9611	0.993295	CTAATTAC
MA0158.2.HOXA5	11.9978	0.993222	GTAATTAG
MA0098.1.ETS1	7.63289	0.992422	CTTCCT
MA0100.3.MYB	12.4145	0.992334	ACCAACTGCA
MA0491.1.JUND	16.1906	0.992131	AATGACTCATG
MA0490.2.JUNB	16.6116	0.991993	AAATGACTCATGT
MA0465.1.CDX2	15.8361	0.991	GAGCAATAAAA
MA0442.2.SOX10	13.8373	0.990595	AGAACAAAGGA
MA1577.1.TLX2	11.4719	0.99021	GTAATTAG
MA0095.1.YY1	8.19127	0.990201	ACCATC
MA0726.1.VSX2	12.1829	0.989874	CTAATTAC
MA0671.1.NFIX	10.3797	0.98987	CTTGCCAAG
MA0508.2.PRDM1	15.6819	0.98961	TCACTTTCTC
MA0491.2.JUND	16.3303	0.989604	AAATGACTCATGT
MA1504.1.HOXC4	10.6388	0.989554	GTAATTAG
MA0707.2.MNX1	10.4405	0.988863	GTAATTAG
MA0661.1.MEOX1	12.7714	0.988745	CCTAATTACC
MA0886.1.EMX2	12.8974	0.988372	GGTAATTAGG
MA0477.2.FOSL1	15.9736	0.988119	AAATGACTCATGT
MA1535.1.NR2C1	11.2423	0.987913	TGAGGTCAA
MA1500.1.HOXB6	10.6552	0.987656	CTAATTAC
MA1499.1.HOXB4	11.4835	0.987466	GTAATTAG
MA0103.2.ZEB1	14.2405	0.987179	ACTCACCTG
MA0027.2.EN1	11.2838	0.986767	GTAATTAG
MA0888.1.EVX2	11.6821	0.986567	GGTAATTAGG
MA1501.1.HOXB7	13.7058	0.98574	GGTAATTAGG
MA0670.1.NFIA	12.5587	0.985543	CTTGCCAAGA
MA0902.1.HOXB2	10.5594	0.985279	GGTAATTAGG
MA0625.2.NFATC3	11.0011	0.985112	GTGGAAAAA
MA1476.1.DLX5	11.34	0.985026	GTAATTAG
MA0841.1.NFE2	17.5904	0.98498	AATGACTCATG
MA0673.1.NKX2-8	11.8362	0.984566	ACACTTGAA
MA1638.1.HAND2	12.5138	0.984454	AGCAGATGCC
MA0493.2.KLF1	13.7846	0.984312	TGGGTGGGG
MA1496.1.HOXA4	10.3991	0.98385	GTAATTAG
MA1519.1.LHX5	11.8179	0.983682	GTAATTAG
MA0075.3.PRRX2	12.146	0.983362	CTAATTAC
MA0684.2.RUNX3	14.1449	0.983315	CAAACCTCAATC
MA0476.1.FOS	14.5686	0.983241	AATGACTCATG
MA0887.1.EVX1	11.4366	0.982841	GGTAATTAGG
MA0830.1.TCF4	12.7196	0.981961	AGCACCTGTC
MA0490.1.JUNB	14.7901	0.981129	AAATGACTCAT
MA0477.1.FOSL1	15.3007	0.98077	AATGACTCATG
MA0003.1.TFAP2A	9.78343	0.980147	GCCGGGGGC
MA0522.2.TCF3	12.5267	0.980085	AGCACCTGTC
MA0876.1.BSX	10.0364	0.979754	CCCATTAC
MA0682.2.PITX1	11.8859	0.979653	ATAATCCC
MA0033.1.FOXL1	8.26506	0.979612	TATATATA
MA0642.2.EN2	10.886	0.979517	CCTAATTA
MA0710.1.NOTO	11.9485	0.979027	CCTAATTACC
MA0913.2.HOXD9	14.4228	0.978927	GCAATAAAAG
MA0701.2.LHX9	11.9721	0.978874	CTAATTAC
MA0522.3.TCF3	13.1816	0.978119	TCCACCTGCTC
MA1132.1.JUN::JUNB	13.785	0.977884	AATGACTCAT
MA0879.2.DLX1	9.94797	0.977611	CTAATTAC
MA0738.1.HIC2	11.1796	0.977517	GTGCCCAGC
MA0907.1.HOXC13	16.0721	0.977335	GCTCGTAAAAG
MA0903.1.HOXB3	10.4521	0.97722	GGTAATTAGG
MA0642.1.EN2	11.6142	0.97707	CCTAATTACC
MA0702.2.LMX1A	12.4579	0.976873	CTAATTAC
MA1648.1.TCF12	12.9865	0.976682	TCCACCTGCTC
MA1558.1.SNAI1	12.7791	0.976277	AGCAGGTGGA
MA0721.1.UNCX	10.1264	0.975996	CTAATTAC
MA1498.1.HOXA7	10.4259	0.97596	GTAATTAG
MA0764.2.ETV4	13.1915	0.975778	GCAGGAAGAG
MA0099.3.FOS::JUN	14.352	0.975754	ATGAGTCATT
MA1108.2.MXI1	11.3262	0.975674	CTCACATGGT
MA1104.1.GATA6	15.0358	0.975641	TGAAGATAAGAAG
MA1497.1.HOXA6	11.1521	0.975366	GGTAATTAGG
MA1505.1.HOXC8	9.96337	0.975178	CTAATTAC
MA0032.1.FOXC1	7.02681	0.97512	GCTGAGTA
MA1138.1.FOSL2::JUNB	14.4653	0.974816	AATGACTCAT
MA0717.1.RAX2	10.0666	0.974718	CTAATTAC
MA0766.2.GATA5	12.0195	0.974562	AAGATAAGAA
MA0498.2.MEIS1	9.15158	0.974549	CTGACAA
MA0889.1.GBX1	12.5728	0.973874	CCTAATTACC
MA1530.1.NKX6-3	11.8437	0.973136	ACCATTAAA
MA0465.2.CDX2	15.3823	0.972679	GAGCAATAAAAG
MA0644.1.ESX1	10.9323	0.972619	CCTAATTACC
MA0077.1.SOX9	12.0334	0.972445	CTATTGTTT
MA0890.1.GBX2	11.7043	0.972409	GGTAATTAGG
MA0892.1.GSX1	10.2658	0.972354	CCTAATTACC
MA0654.1.ISX	10.7808	0.972072	CTAATTAC
MA0712.1.OTX2	10.9656	0.971597	ATAATCCC
MA1502.1.HOXB8	10.4997	0.971592	GTAATTAG
MA0693.2.VDR	10.7919	0.971211	AGAGTTCA
MA0875.1.BARX1	9.81548	0.970625	ACCATTAA
MA0478.1.FOSL2	14.2819	0.970607	AAATGACTCAT
MA0711.1.OTX1	10.8207	0.970288	ATAATCCC
MA0161.2.NFIC	13.0222	0.970269	ATCTTGGCAAG
MA1144.1.FOSL2::JUND	14.3957	0.970236	AATGACTCAT
MA0701.1.LHX9	9.81847	0.970098	GTAATTAG
MA0847.1.FOXD2	10.2358	0.970097	GTAAATA
MA1965.1.SP5	12.8182	0.970095	CGCCTCCCAG
MA0716.1.PRRX1	10.3507	0.96998	CTAATTAC
MA0084.1.SRY	10.762	0.969873	TAAAACAAT
MA0063.2.NKX2-5	12.7117	0.969824	TCCACTCAACT
MA0618.1.LBX1	11.555	0.969733	GTAATTAG
MA1518.1.LHX1	9.12664	0.969258	CTAATTAC
MA1534.1.NR1I3	12.5096	0.968827	GTGAACTCT
MA0102.3.CEBPA	14.2418	0.968608	GTTGCACAACT
MA1645.1.NKX2-2	14.4872	0.968262	CTTCCACTCAACTT
MA1566.1.TBX3	11.1376	0.968025	TAGGTGTGAG
MA1135.1.FOSB::JUNB	14.0125	0.967467	AATGACTCAT
MA0868.2.SOX8	13.1376	0.967245	AGAACAATAC
MA0033.2.FOXL1	10.4667	0.967048	GTAAATA
MA0769.2.TCF7	13.0908	0.966646	TACTTTGATGA
MA0666.1.MSX1	10.3838	0.966638	CTAATTAC
MA0640.2.ELF3	16.2176	0.966216	TTCCACTTCCTTCT
MA0662.1.MIXL1	10.0206	0.966007	CCTAATTACC
MA1634.1.BATF	14.0449	0.965981	AATGACTCATG
MA0462.2.BATF::JUN	14.1875	0.965805	AATGACTCATG
MA0508.3.PRDM1	14.0053	0.964875	TCCTTTCTCTG
MA0700.1.LHX2	11.9882	0.964778	CCTAATTACC
MA0499.2.MYOD1	14.8428	0.96389	TAGCACCTGTCTA
MA1547.2.PITX2	11.7065	0.963811	ATAATCCC
MA0630.1.SHOX	9.65977	0.963595	GTAATTAG
MA1471.1.BARX2	13.2456	0.96341	TAATACCATTAC
MA0846.1.FOXC2	14.6894	0.962771	TAAATAAATAAA
MA0599.1.KLF5	12.5351	0.962717	ACCCCACCCA
MA1116.1.RBPJ	11.429	0.962409	TGTGGGAATT
MA0714.1.PITX3	11.1658	0.962224	ATTAATCCA
MA0634.1.ALX3	10.931	0.96188	CCTAATTACC
MA1567.1.TBX6	12.0348	0.961835	TAGGTGTGAG
MA1498.2.HOXA7	9.19627	0.961632	CCCATTAC
MA1970.1.TRPS1	14.0105	0.961302	CTTCTTATCTTC
MA0899.1.HOXA10	12.7765	0.961201	AGCAATAAAAG
MA0056.2.MZF1	14.1369	0.961149	AAAATCCCCAGAA
MA1708.1.ETV7	13.5642	0.96061	GGGAGGAAGTG
MA0475.1.FLI1	14.5849	0.960404	GGAGGAAGTGG
MA0103.3.ZEB1	12.0846	0.960058	TCCACCTGCTC
MA0039.4.KLF4	14.1459	0.95988	AACCCCACCCAT
MA0878.3.CDX1	14.1084	0.95975	AGCAATAAAA
MA1559.1.SNAI3	13.8048	0.959655	AGCAGGTGGA
MA0877.2.BARHL1	9.20739	0.959623	GTAAATGG
MA0650.1.HOXA13	13.3722	0.959543	ACAATAAAAA
MA0037.1.GATA3	7.42236	0.959485	AGATTG
MA0835.2.BATF3	14.1655	0.959377	AATGACTCATG
MA1130.1.FOSL2::JUN	13.922	0.95935	ACATGAGTCATT
MA0032.2.FOXC1	13.7056	0.959227	TAAATAAATAA
MA2003.1.NKX2-4	11.54	0.959084	ACACTTGAAA
MA0836.2.CEBPD	15.1675	0.958761	AGTTGCACAACTT
MA0708.2.MSX2	10.2186	0.958758	CTAATTAC
MA0594.2.HOXA9	9.9671	0.958469	CTCGTAAAAG
MA0675.1.NKX6-2	9.35671	0.958207	CTAATTAC
MA0910.2.HOXD8	10.1026	0.958135	GTAATTAG
MA0666.2.MSX1	10.333	0.958011	CTAATTAC
MA0158.1.HOXA5	8.66279	0.957973	CATAAATT
MA1473.1.CDX4	14.2037	0.957827	AGCAATAAAAG
MA0462.1.BATF::JUN	13.398	0.957424	CAAATGACTCA
MA1515.1.KLF2	12.7039	0.957284	AACCCCACCCA
MA0122.2.NKX3-2	11.9024	0.957265	GCCACTTAT
MA0597.1.THAP1	9.44442	0.956679	CTGCCCAGA
MA0479.1.FOXH1	13.0595	0.95634	TTAAATACACA
MA0706.1.MEOX2	10.5429	0.954882	GGTAATTAGG
MA0157.1.FOXO3	10.7984	0.954864	TGAAAACA
MA0018.4.CREB1	14.2905	0.954529	CTCTGATGTCACC
MA1137.1.FOSL1::JUNB	13.2964	0.953058	AAATGACTCATGT
MA0466.1.CEBPB	12.6721	0.95277	AGTTGCACAAC
MA0136.2.ELF5	12.798	0.952421	ACCAGGAAGCA
MA0712.2.OTX2	12.3698	0.952015	CTGGGATTATAG
MA0894.1.HESX1	10.9457	0.95191	CCTAATTACC
MA0905.1.HOXC10	11.8912	0.951908	CTCGTAAAAG
MA0510.1.RFX5	15.5852	0.95187	TTCCACAGCAACTGG
MA0842.1.NRL	11.6339	0.951811	CAAGTGCTGAC
MA0848.1.FOXO4	10.2484	0.951265	GTAAATA
MA0850.1.FOXP3	9.35863	0.951146	GCAAACA
MA0466.2.CEBPB	12.2742	0.951038	GTTGCACAAC
MA0699.1.LBX2	10.1214	0.950908	CCTAATTACC
MA0473.1.ELF1	15.1675	0.950859	GAACCAGGAAGCA
MA0625.1.NFATC3	11.4804	0.950676	TTTTTCCACA
MA0068.2.PAX4	10.9705	0.950495	CTAATTAC
MA0672.1.NKX2-3	11.3197	0.950462	CACACTTGAA
MA0042.2.FOXI1	10.5742	0.94941	GTAAATA
MA0674.1.NKX6-1	9.77622	0.949294	CTAATTAC
MA1710.1.ZNF257	13.8623	0.949021	CTGAGGCAGGAG
MA1525.2.NFATC4	11.8676	0.948738	TGTGGAAAAA
MA0035.4.GATA1	12.3487	0.948672	TTCTTATCTTC
MA1563.1.SOX18	8.46669	0.948594	CACCATGC
MA1630.2.ZNF281	15.9367	0.948518	GGGGGATGGGCA
MA0878.2.CDX1	13.8191	0.948106	AGCAATAAAAG
MA0708.1.MSX2	10.3614	0.948093	CTAATTAC
MA1928.1.BNC2	12.94	0.948043	ACATGAGTCATT
MA0703.1.LMX1B	9.3122	0.947784	GTAATTAG
MA1134.1.FOS::JUNB	13.7214	0.947702	CATGAGTCATTT
MA0909.1.HOXD13	12.4845	0.947434	GCAATAAAAG
MA1959.1.KLF7	12.1469	0.947429	TGGGTGGGG
MA0651.1.HOXC11	13.2894	0.947387	GCTCGTAAAAG
MA0837.1.CEBPE	12.1371	0.947009	GTTGCACAAC
MA0645.1.ETV6	12.7857	0.946948	GGAGGAAGTG
MA1579.1.ZBTB26	13.4026	0.94631	GTCTCCAGAACTGTG
MA1525.1.NFATC4	11.4231	0.946104	TGTGGAAAAA
MA1128.1.FOSL1::JUN	13.6587	0.945949	AAATGACTCATGT
MA0793.1.POU6F2	12.5727	0.945268	ACCTAATTAC
MA0526.1.USF2	12.7123	0.945164	ACCAGGTGACT
MA0508.1.PRDM1	18.1994	0.944656	AGAAAGTGAGAGTGG
MA0820.1.FIGLA	11.4491	0.944215	TCCACCTGCT
MA0901.1.HOXB13	12.8608	0.943954	ACAATAAAAA
MA0148.3.FOXA1	13.6176	0.94343	GTTCTGTTTGCTTTG
MA1100.2.ASCL1	10.9983	0.943191	AGCAGATGCC
MA0658.1.LHX6	11.3567	0.943018	GGTAATTAGG
MA0485.2.HOXC9	12.4347	0.942875	CTCGTAAAAG
MA1596.1.ZNF460	21.8795	0.942604	GCCTCAGCCTCCTGAG
MA1569.1.TFAP2E	10.5353	0.942253	TGCCCCCGGCC
MA0489.1.JUN	13.7334	0.941658	TTCAAATGACTCAT
MA0847.2.FOXD2	13.7581	0.941064	GATAAATAAATAA
MA1141.1.FOS::JUND	13.7706	0.938507	ACATGAGTCATTT
MA0707.1.MNX1	10.0047	0.938428	GGTAATTAGG
MA1601.1.ZNF75D	12.5819	0.938225	GTGTGGGAAT
MA0017.2.NR2F1	13.7724	0.938025	CTGAGGTCAGGAG
MA0893.1.GSX2	9.35848	0.93779	CCTAATTACC
MA0836.1.CEBPD	11.7654	0.93768	GTTGCACAAC
MA0745.2.SNAI2	13.4224	0.937572	TAGCACCTGTCTA
MA0528.2.ZNF263	13.6966	0.93722	GGTGGGAGGAAG
MA0906.1.HOXC12	13.3796	0.937084	GCTCGTAAAAG
MA0597.2.THAP1	13.2646	0.93691	TGGGAGGGCAGG
MA0036.2.GATA2	13.5827	0.93678	TCCTTCTTATCTTC
MA0482.2.GATA4	13.064	0.936766	CTTCTTATCTTC
MA0808.1.TEAD3	9.30937	0.936511	TCATTCCT
MA0124.1.NKX3-1	9.80297	0.936115	TTACTTA
MA0042.1.FOXI1	12.4387	0.936071	ATTTATTTATTT
MA1467.1.ATOH1	12.8692	0.936025	AACAGCTGAT
MA0891.1.GSC2	10.0403	0.935798	TATAATCCCA
MA0105.3.NFKB1	12.7845	0.935481	TGGGCTTCCCA
MA0079.2.SP1	12.0757	0.935413	CCCATCCCCC
MA1655.1.ZNF341	12.8768	0.935185	GGGAACAGCTGA
MA0740.2.KLF14	11.7534	0.935134	TGGGTGGGG
MA0648.1.GSC	10.5428	0.935034	ATTAATCCAC
MA1503.1.HOXB9	12.3002	0.934984	CTCGTAAAAG
MA1104.2.GATA6	13.6774	0.934737	CCTTCTTATCTTC
MA0713.1.PHOX2A	13.4025	0.93454	AAACCTAATTA
MA1631.1.ASCL1	13.151	0.934486	GTCCACCTGCTCT
MA0765.2.ETV5	11.8194	0.934338	CCACTTCCTCC
MA0018.2.CREB1	9.77187	0.934202	TGAGGTCA
MA0829.2.SREBF1	14.8777	0.934138	GGATCACCTGAGGT
MA0635.1.BARHL2	8.9918	0.933978	ATTAAACAGT
MA0007.2.AR	14.2314	0.933774	AAGCACATAGTGTAT
MA0496.1.MAFK	14.2084	0.933655	CAGAGTCAGCACTTG
MA0702.1.LMX1A	9.96264	0.933579	GTAATTAG
MA0775.1.MEIS3	9.23212	0.933491	GTGACATC
MA1635.1.BHLHE22	9.83697	0.933434	AACAGCTGAT
MA1549.1.POU6F1	10.6544	0.933316	GTAATTAGGT
MA0071.1.RORA	11.9472	0.933241	TTATAGGTCA
MA0160.1.NR4A2	9.73828	0.933227	AAGGACAC
MA0718.1.RAX	9.9742	0.933102	GGTAATTAGG
MA1472.1.BHLHA15	10.4461	0.932433	ATCAGCTGTT
MA1483.2.ELF2	13.2492	0.932418	AACCAGGAAGCA
MA0810.1.TFAP2A	11.4901	0.931294	TGCCCCCGGCCC
MA0003.3.TFAP2A	11.2161	0.931115	TGCCCCCGGCC
MA1506.1.HOXD10	12.8841	0.930872	GCTCGTAAAAG
MA0598.3.EHF	15.1239	0.930546	TCCACTTCCTTCTTA
MA0093.2.USF1	11.9715	0.930468	ACCAGGTGACT
MA1120.1.SOX13	10.88	0.929783	AAACAATAGGT
MA0849.1.FOXO6	9.14239	0.929555	GTAAATA
MA1986.1.ZNF692	10.9711	0.929392	CAGGCCCACT
MA0873.1.HOXD12	12.7924	0.928882	GCTCGTAAAAG
MA0160.2.NR4A2	11.7421	0.928755	TTATAGGTCA
MA0523.1.TCF7L2	13.4776	0.928701	GAGGATCAAAGCAC
MA0511.2.RUNX2	11.0409	0.928382	AAACCACAC
MA0492.1.JUND	12.734	0.927856	AATGGTGACATAATT
MA0079.3.SP1	11.6379	0.927559	ACTCCGCCTCC
MA0909.2.HOXD13	12.8922	0.927473	CACAATAAAAA
MA0500.2.MYOG	11.4949	0.927464	TATCAGCTGTTC
MA0838.1.CEBPG	11.6489	0.927413	GTTGCACAAC
MA1725.1.ZNF189	14.1087	0.927249	TCAGCTGTTCCCT
MA0914.1.ISL2	9.18846	0.926546	GCACTTTG
MA0468.1.DUX4	11.0776	0.926283	TGAACTAATCA
MA1480.1.DPRX	11.35	0.926261	AGATAATACT
MA0908.1.HOXD11	11.6472	0.92575	CTCGTAAAAG
MA0847.3.FOXD2	13.2102	0.925729	GATAAATAAATA
MA1570.1.TFAP4	9.84453	0.925527	ATCAGCTGTT
MA0650.2.HOXA13	13.1074	0.925383	AGCAATAAAAG
MA1979.1.ZNF416	13.6914	0.92532	TTTCTGGGCAG
MA0043.1.HLF	11.4754	0.924877	GGTGACATAATT
MA0144.2.STAT3	10.4754	0.92446	CTTCTTGTAAA
MA1641.1.MYF5	11.56	0.923568	GAACAGCTGATA
MA0076.2.ELK4	11.7435	0.923322	CCACTTCCTCC
MA0665.1.MSC	13.3727	0.92278	AACAGCTGAT
MA0651.2.HOXC11	13.7933	0.921542	AGCTCGTAAAAG
MA0137.3.STAT1	11.7909	0.921527	TCTCCAGGAAA
MA0043.2.HLF	10.8669	0.920823	AATTATGTCACC
MA0845.1.FOXB1	12.472	0.920551	TAAATAAATAA
MA0018.3.CREB1	12.6165	0.920551	TCTGATGTCACC
MA0593.1.FOXP2	11.5803	0.920016	ATGAAAACACA
MA0471.1.E2F6	10.7627	0.919811	AGGTGGGAGGA
MA0639.1.DBP	10.6211	0.919745	GGTGACATAATT
MA0473.3.ELF1	14.3451	0.91974	AAGAAGGAAGTGGA
MA0154.2.EBF1	9.80989	0.919342	ATCTCAAGAGG
MA0043.3.HLF	12.5581	0.918994	AAGTTGTGCAACTC
MA0884.1.DUXA	12.9204	0.91846	GTGAACTAATCAC
MA1111.1.NR2F2	11.307	0.918017	TATAGGTCAAG
MA0041.2.FOXD3	15.5939	0.917745	TAAATAAATAAATAAA
MA1524.1.MSGN1	9.70807	0.916828	GGGCATTTGGGA
MA1509.1.IRF6	11.365	0.916823	AGCGAAACT
MA1517.1.KLF6	10.8557	0.9168	AACCCCACCCA
MA1113.2.PBX2	13.1699	0.916446	CCCATAAATTATG
MA0143.4.SOX2	10.5659	0.916352	AAACAATAGGT
MA1566.2.TBX3	12.3057	0.916268	TAGGTGTGAGC
MA1523.1.MSANTD3	10.5621	0.916122	TTCCACTCAA
MA0090.2.TEAD1	9.41312	0.916071	CACCTTCCAC
MA0690.1.TBX21	12.2998	0.915656	TAGGTGTGAG
MA0047.3.FOXA2	10.97	0.914971	CAGTAAATAAT
MA0481.3.FOXP1	10.7123	0.914892	CAGTAAATAAT
MA1151.1.RORC	10.9779	0.91485	TAAATTATGTCA
MA1150.1.RORB	10.9122	0.914385	TTATAGGTCAA
MA0830.2.TCF4	11.9889	0.914306	GTCCACCTGCTCT
MA1593.1.ZNF317	12.9692	0.91409	GAACAGCTGATA
MA0516.3.SP2	10.9069	0.913848	GAGGCGGAG
MA1131.1.FOSL2::JUN	12.7609	0.913772	GGTGACATAAT
MA1511.2.KLF10	11.031	0.913394	TGGGTGGGG
MA0688.1.TBX2	11.517	0.912911	TAGGTGTGAGC
MA0684.1.RUNX3	10.8928	0.912587	AAACCACACT
MA0877.3.BARHL1	9.20808	0.912332	ACAGTTTA
MA0058.2.MAX	9.76538	0.912185	ATTCACATGC
MA0098.3.ETS1	10.5952	0.911996	GCAGGAAATG
MA0474.2.ERG	10.2754	0.91196	ACAGGAAACC
MA0481.2.FOXP1	11.534	0.911678	AAGCAAACAGAA
MA1143.1.FOSL1::JUND	10.4357	0.911607	GTGACATAAT
MA0884.2.DUXA	11.6162	0.911463	CTGATTTATTCAA
MA0079.1.SP1	9.30469	0.911425	GGGGTTGGGT
MA0814.1.TFAP2C	10.1951	0.91138	AGGCTGAGGCA
MA1508.1.IKZF1	12.3783	0.91138	GAACCAGGAAGC
MA1511.1.KLF10	11.0265	0.911283	ACCCCACCCAT
MA1578.1.VEZF1	9.85615	0.910113	CCCCCCAATC
MA1484.1.ETS2	9.07663	0.910041	CACAGGAAAC
MA0524.1.TFAP2C	11.5893	0.909785	CTTATCTTCAGGCCA
MA0495.1.MAFF	15.2212	0.909637	GCAGAGTCAGCACTTGCC
MA0842.2.NRL	12.0895	0.909373	GCAAGTGCTGACT
MA0102.4.CEBPA	13.3936	0.909193	GAGTTGCACAACTT
MA1540.1.NR5A1	10.3804	0.908537	CACAAGGACAG
MA1683.1.FOXA3	10.5432	0.908248	CAGTAAATAAT
MA1642.1.NEUROG2	10.7546	0.908014	GCAGCAGATGCCC
MA0628.1.POU6F1	10.3059	0.907881	CCTAATTACC
MA0509.2.RFX1	13.884	0.907787	CAGTTGCTGTGGAA
MA0814.2.TFAP2C	12.772	0.907713	GGTCCTGAGGCTGA
MA1717.1.ZNF784	11.458	0.907675	ATACCTACCCA
MA0746.1.SP3	11.1139	0.907341	ACCCCACCCAT
MA0802.1.TBR1	11.3358	0.90712	AGGTGTGAGC
MA0809.1.TEAD4	8.75626	0.907083	CAAATTCCCA
MA0162.2.EGR1	11.8236	0.906801	TTGCCTCCCCCACT
MA1565.1.TBX18	12.5363	0.906025	ATAGGTGTGAGC
MA1585.1.ZKSCAN1	10.9231	0.905953	GCAGTAGGGG
MA0798.2.RFX3	14.1178	0.905885	CAGTTGCTGTGGAA
MA1483.1.ELF2	12.1106	0.905784	AACCAGGAAGCA
MA0753.1.ZNF740	11.5978	0.905307	CCTCCCCCAC
MA0002.1.RUNX1	10.6501	0.905287	AAGTGTGGTTT
MA0595.1.SREBF1	10.7525	0.90499	GTCACCCAAC
MA1647.1.PRDM4	10.4826	0.904668	GTCTGTTTAAA
MA1640.1.MEIS2	13.5192	0.904362	ACATAATTTATGGGA
MA0689.1.TBX20	12.4266	0.904225	TAGGTGTGAGC
MA0901.2.HOXB13	13.1321	0.903797	ACACAATAAAAAGG
MA0679.2.ONECUT1	15.0739	0.903564	AATAAATAAATAAATA
MA0475.2.FLI1	9.49165	0.903503	ACAGGAAACC
MA1632.1.ATF2	11.8767	0.903402	AAATTATGTCACC
MA1468.1.ATOH7	9.35639	0.903225	AGCAGATGCC
MA0724.1.VENTX	8.23593	0.902878	ACCCATTAC
MA1971.1.ZBED2	11.0539	0.902393	AGAGCGAAACTCCA
MA1100.1.ASCL1	11.9484	0.902365	AGAGCAGGTGGAC
MA1521.1.MAFA	14.5868	0.902345	GTGCTGACTCTGCTC
MA0506.1.NRF1	10.1002	0.901723	GAGCCTGTGCC
MA1709.1.ZIM3	14.4107	0.900955	AACAACAAAAATCTA
MA0003.4.TFAP2A	12.4214	0.900924	TCAGCCTCAGGACC
MA1972.1.ZFP14	14.0003	0.900645	GAAGGAAGTGGAAGG
MA0812.1.TFAP2B	9.92453	0.900639	TGCCCCCGGCC
MA0062.3.GABPA	13.1779	0.900602	TCCACTTCCTTCTT
MA0052.4.MEF2A	13.8772	0.900291	TATTAAAAATACAAA
MA0659.2.MAFG	14.6371	0.89913	GAGTCAGCACTTGCC
MA0081.2.SPIB	15.8814	0.898421	TTCCACTTCCTTCTTA
MA1587.1.ZNF135	15.1512	0.898376	CCTCAGCCTCCTGA
MA0703.2.LMX1B	10.8282	0.898277	AACCTAATTAC
MA1652.1.ZKSCAN5	12.8032	0.897932	TTGGGAGGTGATTA
MA0667.1.MYF6	11.4265	0.89758	AACAGCTGAT
MA1935.1.ERF::FOXI1	12.3318	0.897312	ATAAGAAGGAAGTG
MA1463.1.ARGFX	9.50127	0.89689	GGTAATTAGG
MA0828.1.SREBF2	10.1642	0.896643	ATCACCTGAG
MA0668.1.NEUROD2	8.05763	0.89644	GGCATCTGCT
MA1487.2.FOXE1	12.5887	0.896379	ATTAAAAATACAAA
MA0156.2.FEV	9.40372	0.896019	AAAGGAAGTA
MA0497.1.MEF2C	12.0843	0.895636	CTATTAAAAATACAA
MA1531.1.NR1D1	12.6015	0.895273	GGGGCAGTGGCTCAC
MA0750.2.ZBTB7A	11.7491	0.895061	GGGAGGAAGTGGC
MA1728.1.ZNF549	11.2733	0.894236	TGTGCTGTCCAA
MA1112.2.NR4A1	10.2295	0.894232	ATAAAAGTCATA
MA0871.1.TFEC	9.38582	0.893843	ACCAGGTGAC
MA0470.1.E2F4	9.41004	0.893828	CAGCGGGAGCC
MA0811.1.TFAP2B	9.63599	0.893174	TGCCCCCGGCCC
MA1707.1.DMRTA1	10.6146	0.892873	TTCTGTTACAGT
MA0093.1.USF1	8.36731	0.892505	CATGTGG
MA0598.2.EHF	12.9209	0.892465	AACCAGGAAGCA
MA0767.1.GCM2	9.82575	0.891996	AATGTGGGTG
MA0774.1.MEIS2	8.60925	0.891805	TGGACAGC
MA0481.1.FOXP1	13.4532	0.891686	CCCATGAAAACACAG
MA0107.1.RELA	11.1018	0.890942	GGGAATTTGC
MA0764.1.ETV4	9.45426	0.890253	AAAGGAAGTA
MA0685.2.SP4	9.30934	0.890233	TGGGAGGTG
MA0031.1.FOXD1	9.24466	0.890183	TTAAACAA
MA0524.2.TFAP2C	9.59496	0.890098	TGCCCCCGGCCC
MA0140.2.GATA1::TAL1	12.5538	0.889953	CTTATCTTCAGGCCACAT
MA0511.1.RUNX2	12.3076	0.889831	GGAAAGTGTGGTTTG
MA1963.1.SATB1	10.5198	0.889554	TTCCTAATACCAT
MA0259.1.ARNT::HIF1A	7.49185	0.889406	AGGCGTGG
MA0105.1.NFKB1	10.4814	0.889388	GGGAATTTGC
MA1478.1.DMRTA2	10.2181	0.889356	TTCTGTTACAGT
MA0488.1.JUN	9.29259	0.888926	TCTCTGATGTCAC
MA1522.1.MAZ	9.20573	0.888705	TCCGCCTCCCA
MA0761.2.ETV1	12.0199	0.887941	GGGCAGGAAATGTA
MA0700.2.LHX2	9.08015	0.887426	CACCTATTATA
MA0592.3.ESRRA	11.9257	0.886066	GCTCATGGTCACA
MA0258.2.ESR2	11.8217	0.885941	AGGTCACACAATTCT
MA0742.2.KLF12	9.51289	0.885242	GGGCCGGGG
MA0473.2.ELF1	11.7487	0.88518	AACCAGGAAGCA
MA1964.1.SMAD2	7.64836	0.884695	ACCTAGACAG
MA0831.1.TFE3	8.35514	0.884493	ACCATGTGAG
MA1961.1.PATZ1	10.7057	0.884445	GGGGGGATGGGC
MA0819.1.CLOCK	9.66966	0.88437	GACAAGTGTC
MA1101.2.BACH2	12.6419	0.88431	TTCAAATGACTCATGTCTG
MA1952.1.FOXJ2::ELF1	12.2363	0.884268	ATAAGAAGGAAGTG
MA1112.1.NR4A1	8.75871	0.883926	TATAGGTCAA
MA0613.1.FOXG1	7.89026	0.883433	TTAAACAA
MA0528.1.ZNF263	14.9735	0.883119	TAAGAAGGAAGTGGAAGGAGG
MA0024.2.E2F1	7.64564	0.883048	TGGGCAGGAAG
MA1136.1.FOSB::JUNB	10.484	0.882988	ATTATGTCAC
MA0800.1.EOMES	11.2636	0.882811	TAGGTGTGAGCCA
MA0038.2.GFI1	8.88877	0.882308	GAAATCAGTTCT
MA0690.2.TBX21	11.3424	0.882298	GCTCACACCTA
MA1103.1.FOXK2	9.42642	0.882101	TTTTAAACAGA
MA0028.1.ELK1	8.10962	0.88174	GGGCAGGAAG
MA0079.5.SP1	9.36854	0.881682	GGGCCGGGG
MA0632.2.TCFL5	7.11294	0.881661	TCACATGCTC
MA0048.2.NHLH1	9.81962	0.88161	AACAGCTGAT
MA0765.1.ETV5	8.18442	0.881565	AAAGGAAGTA
MA1520.1.MAF	13.6297	0.881105	GAGCAGAGTCAGCAC
MA1475.1.CREB3L4	10.855	0.880826	GGTGACATCAGA
MA0656.1.JDP2	9.27548	0.880791	AATTATGTCACC
MA0157.2.FOXO3	8.60383	0.880542	GTAAATAA
MA1720.1.ZNF85	14.0604	0.880341	GCTGGGATTACAGCCG
MA1117.1.RELB	9.91895	0.88019	AAAATCCCCAG
MA1512.1.KLF11	9.32363	0.880166	ACCCCACCCAT
MA1940.1.ETV2::DRGX	12.759	0.879869	TCAGGAAATATTTA
MA1516.1.KLF3	8.6651	0.879855	GACCTCACCCA
MA0605.2.ATF3	8.01595	0.879739	GGTGACATAATT
MA0753.2.ZNF740	13.0133	0.879475	TTGCCTCCCCCAC
MA0101.1.REL	9.02236	0.87918	GGGATTTTTC
MA0495.3.MAFF	13.6149	0.879146	GAGTCAGCACTTGCCA
MA0692.1.TFEB	8.54516	0.87914	ACCATGTGAG
MA0062.1.GABPA	10.0484	0.878919	GCAGGAAGAG
MA0147.3.MYC	10.1068	0.878849	GTCCACCTGCTC
MA0640.1.ELF3	12.3691	0.878821	AACCAGGAAGCAG
MA1564.1.SP9	10.457	0.878763	ACTCCGCCTCCC
MA1102.2.CTCFL	10.6033	0.878378	GGCCGGGGGCAG
MA0079.4.SP1	9.21299	0.878344	CAAACTCCGCCTCCC
MA0046.2.HNF1A	11.8109	0.8783	AATAAATAAATAAAT
MA0484.1.HNF4G	10.0119	0.87828	CAAGATCAAGGTGCT
MA0095.2.YY1	10.5541	0.878006	CAACATGGAGAA
MA0641.1.ELF4	12.0562	0.877989	AACCAGGAAGCA
MA0014.3.PAX5	10.3578	0.877989	AGGCGTGAGCCA
MA0018.1.CREB1	9.38028	0.877878	CTGGGTGAGGTC
MA1548.1.PLAGL2	8.90605	0.877661	TGGGGCCTCA
MA1127.1.FOSB::JUN	11.6347	0.877215	GGTGACATAAT
MA1115.1.POU5F1	9.45889	0.876585	TGATGGAAATG
MA0052.1.MEF2A	11.1104	0.876272	CTATATATAT
MA1592.1.ZNF274	9.7205	0.87613	GAAAGGACTTCTCGGT
MA0831.2.TFE3	7.68748	0.8758	CATGTGAG
MA1639.1.MEIS1	10.2402	0.875698	TGAATAAATCAGG
MA1103.2.FOXK2	9.22183	0.875661	TTTTAAACAGA
MA1527.1.NFIC	12.5337	0.875548	CTTGGCTCACTGCAAAC
MA0025.1.NFIL3	10.2612	0.875469	TTATCTAACTT
MA0843.1.TEF	8.14681	0.875331	AATTATGTCACC
MA0895.1.HMBOX1	7.97829	0.875209	CCTGGTTTCC
MA0052.2.MEF2A	10.9366	0.875086	ATACAAAATTAGCCA
MA0747.1.SP8	10.5606	0.875072	GCCTCCCCCACT
MA1646.1.OSR2	9.77671	0.875043	TAACAGAAGGGA
MA0761.1.ETV1	8.6317	0.875021	AAAGGAAGTA
MA1489.1.FOXN3	9.56102	0.875	GTAAATAA
MA0003.2.TFAP2A	11.2628	0.874806	CACTGCCCCCGGCCC
MA0741.1.KLF16	10.0205	0.874749	GCCCATCCCCC
MA0715.1.PROP1	11.0969	0.874049	AAACCTAATTA
MA0114.2.HNF4A	10.4542	0.874026	CAGCACCTTGATCTT
MA0058.1.MAX	8.95511	0.873857	AACCAGGTGA
MA0792.1.POU5F1B	8.6475	0.873802	GATGGAAAT
MA0686.1.SPDEF	9.01355	0.873794	ACCAGGAAGCA
MA0471.2.E2F6	10.36	0.87319	CTGGGCAGGAAGA
MA1936.1.ERF::FOXO1	10.6831	0.872987	ATAAGAAGGAAGTG
MA1653.1.ZNF148	11.4131	0.872798	TGCCCATCCCCC
MA1140.1.JUNB	9.92363	0.872761	GTGACATAAT
MA0155.1.INSM1	10.9005	0.872673	GGGCTGGGGGTG
MA1574.1.THRB	10.4939	0.872661	GAGTTCACAGTTTAG
MA1129.1.FOSL1::JUN	10.2135	0.872602	ATTATGTCAC
MA1937.1.ERF::HOXB13	11.2016	0.872493	AGAGGAAATTAGAAAT
MA0058.3.MAX	7.40678	0.872318	ACCATGTGAG
MA1113.1.PBX2	10.913	0.872172	CTGATTGAGAGC
MA1139.1.FOSL2::JUNB	10.8572	0.871834	GGTGACATAATT
MA0756.2.ONECUT2	7.18198	0.871755	TGGTCAATG
MA0516.1.SP2	10.8299	0.871007	ACTCCGCCTCCCAGG
MA1943.1.ETV2::HOXB13	11.0433	0.870766	TCAGGAAATATTTAT
MA0592.1.ESRRA	10.5459	0.87076	TCATGGTCACA
MA0610.1.DMRT3	9.37771	0.870471	ACTGTAACAGA
MA1532.1.NR1D2	10.9151	0.870411	GGGGCAGTGGCTCAC
MA0600.1.RFX2	13.6185	0.870333	CTTTCCACAGCAACTGGTC
MA0090.1.TEAD1	10.9703	0.870133	CACTTTCCACAG
MA0757.1.ONECUT3	12.1525	0.870007	AATAAATAAATAAA
MA1644.1.NFYC	9.40659	0.869682	AGCCAGTCACT
MA0760.1.ERF	9.64986	0.869354	GCAGGAAATG
MA1122.1.TFDP1	9.21967	0.869276	CAGCGGGAGCC
MA1581.1.ZBTB6	10.3106	0.868987	GACCATGAGCCAG
MA0014.2.PAX5	12.0852	0.868752	AAAATTAGCCAGGCGTGGT
MA0759.1.ELK3	8.88935	0.868344	AAAGGAAGTA
MA1118.1.SIX1	10.4543	0.867965	GAAACCTAATT
MA1532.2.NR1D2	9.21119	0.867745	GGGGGCAGTGGCTCA
MA1149.1.RARA::RXRG	12.3593	0.867664	GAGGTCAAGGAAGGGAAG
MA0669.1.NEUROG2	8.68626	0.86737	AGCAGATGCC
MA1109.1.NEUROD1	9.49135	0.867334	TAACAGAAGGGAA
MA0764.3.ETV4	8.12457	0.866554	GCAGGAAATG
MA0091.1.TAL1::TCF3	10.1549	0.866209	GGAACAGCTGAT
MA0050.1.IRF1	11.261	0.865828	AAGAGCGAAACT
MA1601.2.ZNF75D	11.7591	0.865741	GTGGAAAGTGCT
MA1145.1.FOSL2::JUND	11.3714	0.865535	GGGTGACATCAGAGA
MA0809.2.TEAD4	9.23626	0.865305	TCTCATTCCTGA
MA0649.1.HEY2	8.47985	0.865277	GACAAGTGTC
MA1562.1.SOX14	10.0567	0.864921	GAGAACAATA
MA0080.5.SPI1	15.6309	0.864912	GATAAGAAGGAAGTGGAAGG
MA0785.1.POU2F1	9.62369	0.86475	ATGATGGAAATG
MA0646.1.GCM1	8.63471	0.864215	AATGTGGGTGG
MA0819.2.CLOCK	7.1356	0.863743	AGAAATGTGT
MA0025.2.NFIL3	9.73577	0.863618	AGTTGTGCAACTC
MA0093.3.USF1	10.5593	0.863196	GAACCAGGTGACTT
MA1542.1.OSR1	7.16742	0.862346	CCCTTCTGTT
MA0148.4.FOXA1	9.51441	0.862161	ATATAAATATTG
MA0141.3.ESRRB	9.40459	0.861807	TCATGGTCACA
MA0827.1.OLIG3	7.08029	0.861356	AAAATAAGTT
MA0502.2.NFYB	9.99133	0.861076	GTCAATGGCCAC
MA0762.1.ETV2	9.17133	0.860806	CACAGGAAACC
MA0137.2.STAT1	11.0907	0.860684	GAGTTCCTGTAACCC
MA1967.1.TFAP4::FLI1	14.0368	0.860643	GAAGGGAACAGCTGAT
MA0818.2.BHLHE22	6.41001	0.860316	AGCAGATGCC
MA1947.1.ETV5::FOXO1	10.0677	0.860111	ATAAGAAGGAAGT
MA0060.3.NFYA	8.60667	0.859777	AGCCAGTCACT
MA1123.1.TWIST1	8.77149	0.859571	GCAGCAGATGCCC
MA0496.3.MAFK	12.7473	0.859097	TCCTGCCTCAGCCTC
MA0663.1.MLX	9.4172	0.859061	TTCAAGTGAT
MA0837.2.CEBPE	7.57349	0.858947	AGTTGCACAACT
MA1544.1.OVOL1	7.75036	0.858891	AATACCATTACCTT
MA0825.1.MNT	7.22618	0.858556	AGCATGTGAA
MA0517.1.STAT1::STAT2	12.1106	0.858388	TGGGTTTTTATTTCT
MA1975.1.ZNF214	11.8485	0.857681	CAAGATCAAGGTGCT
MA1421.1.TCF7L1	12.147	0.857357	CAAGATAAAAGA
MA0798.1.RFX3	10.0133	0.857328	AATTACCAAGGTAATG
MA0526.3.USF2	10.2718	0.857315	GAACCAGGTGACTT
MA0871.2.TFEC	7.20703	0.856701	ACCAGGTGACT
MA1133.1.JUN::JUNB	10.261	0.856578	GGTGACATCAGA
MA0596.1.SREBF2	9.16835	0.856497	GTTGGGTGAC
MA1649.1.ZBTB12	8.1786	0.856486	GTCTTGAACTC
MA1636.1.CEBPG	10.2729	0.855525	ATATGTTGAAACCTA
MA1108.1.MXI1	8.60541	0.855352	GGTCCACCTGCTC
MA1954.1.FOXO1::ELK1	10.6856	0.855153	ATAAGAAGGAAGTG
MA1944.1.ETV5::DRGX	11.587	0.854998	TCAGGAAATATTTA
MA1633.1.BACH1	10.7143	0.85498	GCTGACTCTGCTC
MA1657.1.ZNF652	10.1031	0.854896	TGAAGAGGTAAT
MA0799.1.RFX4	9.42742	0.854821	CATTACCTTGGTAATT
MA0664.1.MLXIPL	8.58844	0.854682	TTCAAGTGAT
MA0083.2.SRF	11.2832	0.854573	TTTCTCCAAAAGTGGCCA
MA1934.1.ERF::FIGLA	8.75995	0.854003	GAAGGGAACAGCTGAT
MA0786.1.POU3F1	9.47549	0.854001	TGATGGAAATGT
MA1568.1.TCF21	7.83859	0.853729	CAGCAGATGCCC
MA0052.3.MEF2A	9.06721	0.853708	CATATATATAGA
MA0756.1.ONECUT2	10.8466	0.853517	AATAAATAAATAAA
MA0072.1.RORA	11.1833	0.853508	ATAAATTATGTCAC
MA1546.1.PAX3	11.3185	0.853456	CAGTTATGCCTGTTAC
MA0076.1.ELK4	9.28194	0.853395	ACTGGAAGC
MA1554.1.RFX7	6.24634	0.853391	TGTCACCAT
MA1966.1.TFAP4::ETV1	11.7716	0.853323	GACGGAGGCAGGCGGA
MA0526.2.USF2	9.4651	0.852935	GTAAGTCACCTGGTTC
MA0024.1.E2F1	8.32861	0.852931	TTTCGCTC
MA1960.1.MGA::EVX1	9.2268	0.852864	AAGAGGTAATGG
MA0740.1.KLF14	9.86278	0.852643	AATCAGGCCCACTT
MA0466.3.CEBPB	6.73058	0.852475	AGTTGTGCAACT
MA1123.2.TWIST1	8.49708	0.852298	GCAGCAGATGCCC
MA0039.3.KLF4	8.70458	0.851185	CCTCACCCAGC
MA0746.2.SP3	7.94884	0.85105	AACCCCACCCATG
MA1110.1.NR1H4	9.17916	0.850934	TCAATGGCCAC
MA0821.2.HES5	7.41262	0.850502	GACACTTGTC
MA0790.1.POU4F1	11.568	0.850247	ATAAATAAATAAAT
MA0768.1.LEF1	12.1096	0.850242	GAGGATCAAAGCACA
MA0754.1.CUX1	6.64397	0.850159	TGATTAATCC
MA0755.1.CUX2	7.3492	0.850135	TGAGCAATAA
MA1949.1.FLI1::DRGX	12.8089	0.850052	TCAGGAAATATTTAT

## Sheet: Shared TF
MA0130.1.ZNF354C
MA0099.2.FOS::JUN
MA0080.2.SPI1
MA1633.2.BACH1
MA0612.1.EMX1
MA0036.1.GATA2
MA0156.1.FEV
MA0719.1.RHOXF1
MA1481.1.DRGX
MA0161.1.NFIC
MA0900.1.HOXA2
MA0900.2.HOXA2
MA1152.1.SOX15
MA0037.3.GATA3
MA0766.1.GATA5
MA0081.1.SPIB
MA0806.1.TBX4
MA0805.1.TBX1
MA0723.2.VAX2
MA0722.1.VAX1
MA0878.1.CDX1
MA0152.1.NFATC2
MA0691.1.TFAP4
MA0902.2.HOXB2
MA0801.1.MGA
MA0723.1.VAX2
MA0912.2.HOXD3
MA0442.1.SOX10
MA0037.2.GATA3
MA0132.2.PDX1
MA0893.2.GSX2
MA1547.1.PITX2
MA0655.1.JDP2
MA0807.1.TBX5
MA0056.1.MZF1
MA1536.1.NR2C2
MA0598.1.EHF
MA0867.2.SOX4
MA0904.2.HOXB5
MA1142.1.FOSL1::JUND
MA0725.1.VSX1
MA0745.1.SNAI2
MA0612.2.EMX1
MA1563.2.SOX18
MA1495.1.HOXA1
MA0080.1.SPI1
MA0882.1.DLX6
MA1507.1.HOXD4
MA0148.1.FOXA1
MA0148.2.FOXA1
MA1125.1.ZNF384
MA0036.3.GATA2
MA0644.2.ESX1
MA0158.2.HOXA5
MA0098.1.ETS1
MA0491.1.JUND
MA0490.2.JUNB
MA0465.1.CDX2
MA0442.2.SOX10
MA1577.1.TLX2
MA0095.1.YY1
MA0726.1.VSX2
MA0671.1.NFIX
MA0491.2.JUND
MA1504.1.HOXC4
MA0707.2.MNX1
MA0661.1.MEOX1
MA0886.1.EMX2
MA0477.2.FOSL1
MA1535.1.NR2C1
MA1500.1.HOXB6
MA1499.1.HOXB4
MA0103.2.ZEB1
MA0027.2.EN1
MA0888.1.EVX2
MA1501.1.HOXB7
MA0670.1.NFIA
MA0902.1.HOXB2
MA0625.2.NFATC3
MA1476.1.DLX5
MA0841.1.NFE2
MA0673.1.NKX2-8
MA1638.1.HAND2
MA0493.2.KLF1
MA1496.1.HOXA4
MA1519.1.LHX5
MA0075.3.PRRX2
MA0476.1.FOS
MA0887.1.EVX1
MA0830.1.TCF4
MA0490.1.JUNB
MA0477.1.FOSL1
MA0003.1.TFAP2A
MA0522.2.TCF3
MA0876.1.BSX
MA0682.2.PITX1
MA0033.1.FOXL1
MA0642.2.EN2
MA0710.1.NOTO
MA0913.2.HOXD9
MA0701.2.LHX9
MA0522.3.TCF3
MA1132.1.JUN::JUNB
MA0879.2.DLX1
MA0738.1.HIC2
MA0903.1.HOXB3
MA0642.1.EN2
MA0702.2.LMX1A
MA1648.1.TCF12
MA1558.1.SNAI1
MA0721.1.UNCX
MA1498.1.HOXA7
MA0764.2.ETV4
MA0099.3.FOS::JUN
MA1108.2.MXI1
MA1104.1.GATA6
MA1497.1.HOXA6
MA1505.1.HOXC8
MA0032.1.FOXC1
MA1138.1.FOSL2::JUNB
MA0717.1.RAX2
MA0766.2.GATA5
MA0498.2.MEIS1
MA0889.1.GBX1
MA1530.1.NKX6-3
MA0465.2.CDX2
MA0644.1.ESX1
MA0077.1.SOX9
MA0890.1.GBX2
MA0892.1.GSX1
MA0654.1.ISX
MA0712.1.OTX2
MA1502.1.HOXB8
MA0693.2.VDR
MA0875.1.BARX1
MA0478.1.FOSL2
MA0711.1.OTX1
MA0161.2.NFIC
MA1144.1.FOSL2::JUND
MA0701.1.LHX9
MA0847.1.FOXD2
MA1965.1.SP5
MA0716.1.PRRX1
MA0084.1.SRY
MA0063.2.NKX2-5
MA0618.1.LBX1
MA1518.1.LHX1
MA1534.1.NR1I3
MA0102.3.CEBPA
MA1645.1.NKX2-2
MA1566.1.TBX3
MA1135.1.FOSB::JUNB
MA0868.2.SOX8
MA0033.2.FOXL1
MA0769.2.TCF7
MA0666.1.MSX1
MA0662.1.MIXL1
MA0508.3.PRDM1
MA0700.1.LHX2
MA0499.2.MYOD1
MA1547.2.PITX2
MA0630.1.SHOX
MA1471.1.BARX2
MA0846.1.FOXC2
MA0599.1.KLF5
MA1116.1.RBPJ
MA0714.1.PITX3
MA0634.1.ALX3
MA1567.1.TBX6
MA1498.2.HOXA7
MA1970.1.TRPS1
MA0899.1.HOXA10
MA0056.2.MZF1
MA1708.1.ETV7
MA0475.1.FLI1
MA0103.3.ZEB1
MA0039.4.KLF4
MA0878.3.CDX1
MA1559.1.SNAI3
MA0877.2.BARHL1
MA0650.1.HOXA13
MA0037.1.GATA3
MA1130.1.FOSL2::JUN
MA0032.2.FOXC1
MA2003.1.NKX2-4
MA0708.2.MSX2
MA0594.2.HOXA9
MA0675.1.NKX6-2
MA0910.2.HOXD8
MA0666.2.MSX1
MA0158.1.HOXA5
MA1473.1.CDX4
MA0462.1.BATF::JUN
MA1515.1.KLF2
MA0122.2.NKX3-2
MA0597.1.THAP1
MA0479.1.FOXH1
MA0706.1.MEOX2
MA0157.1.FOXO3
MA0018.4.CREB1
MA0466.1.CEBPB
MA0136.2.ELF5
MA0712.2.OTX2
MA0894.1.HESX1
MA0905.1.HOXC10
MA0510.1.RFX5
MA0842.1.NRL
MA0848.1.FOXO4
MA0850.1.FOXP3
MA0466.2.CEBPB
MA0699.1.LBX2
MA0473.1.ELF1
MA0625.1.NFATC3
MA0068.2.PAX4
MA0672.1.NKX2-3
MA0042.2.FOXI1
MA0674.1.NKX6-1
MA1710.1.ZNF257
MA1525.2.NFATC4
MA0035.4.GATA1
MA1563.1.SOX18
MA1630.2.ZNF281
MA0878.2.CDX1
MA0708.1.MSX2
MA1928.1.BNC2
MA0703.1.LMX1B
MA0909.1.HOXD13
MA1959.1.KLF7
MA0651.1.HOXC11
MA0837.1.CEBPE
MA0645.1.ETV6
MA1579.1.ZBTB26
MA1525.1.NFATC4
MA0793.1.POU6F2
MA0526.1.USF2
MA0820.1.FIGLA
MA0901.1.HOXB13
MA0148.3.FOXA1
MA1100.2.ASCL1
MA0658.1.LHX6
MA0485.2.HOXC9
MA1569.1.TFAP2E
MA0489.1.JUN
MA0847.2.FOXD2
MA0707.1.MNX1
MA1601.1.ZNF75D
MA0017.2.NR2F1
MA0893.1.GSX2
MA0745.2.SNAI2
MA0528.2.ZNF263
MA0036.2.GATA2
MA0808.1.TEAD3
MA0042.1.FOXI1
MA1467.1.ATOH1
MA0891.1.GSC2
MA0105.3.NFKB1
MA0079.2.SP1
MA1655.1.ZNF341
MA0740.2.KLF14
MA0648.1.GSC
MA1503.1.HOXB9
MA0713.1.PHOX2A
MA1631.1.ASCL1
MA0765.2.ETV5
MA0018.2.CREB1
MA0635.1.BARHL2
MA0496.1.MAFK
MA0702.1.LMX1A
MA0775.1.MEIS3
MA1635.1.BHLHE22
MA1549.1.POU6F1
MA0071.1.RORA
MA0160.1.NR4A2
MA0718.1.RAX
MA1472.1.BHLHA15
MA1483.2.ELF2
MA0810.1.TFAP2A
MA0003.3.TFAP2A
MA0598.3.EHF
MA0093.2.USF1
MA1120.1.SOX13
MA0849.1.FOXO6
MA1986.1.ZNF692
MA0160.2.NR4A2
MA0523.1.TCF7L2
MA0079.3.SP1
MA0500.2.MYOG
MA1725.1.ZNF189
MA0914.1.ISL2
MA0468.1.DUX4
MA1480.1.DPRX
MA0847.3.FOXD2
MA1570.1.TFAP4
MA0650.2.HOXA13
MA1979.1.ZNF416
MA0144.2.STAT3
MA1641.1.MYF5
MA0076.2.ELK4
MA0665.1.MSC
MA0137.3.STAT1
MA0845.1.FOXB1
MA0018.3.CREB1
MA0593.1.FOXP2
MA0471.1.E2F6
MA0154.2.EBF1
MA1111.1.NR2F2
MA0041.2.FOXD3
MA1524.1.MSGN1
MA1509.1.IRF6
MA1517.1.KLF6
MA0143.4.SOX2
MA1523.1.MSANTD3
MA0090.2.TEAD1
MA0047.3.FOXA2
MA0481.3.FOXP1
MA1151.1.RORC
MA1150.1.RORB
MA0830.2.TCF4
MA1593.1.ZNF317
MA0516.3.SP2
MA1511.2.KLF10
MA0877.3.BARHL1
MA0058.2.MAX
MA0098.3.ETS1
MA0474.2.ERG
MA0481.2.FOXP1
MA1143.1.FOSL1::JUND
MA0079.1.SP1
MA0814.1.TFAP2C
MA1508.1.IKZF1
MA1511.1.KLF10
MA1578.1.VEZF1
MA0524.1.TFAP2C
MA0495.1.MAFF
MA0842.2.NRL
MA1540.1.NR5A1
MA1683.1.FOXA3
MA1642.1.NEUROG2
MA0628.1.POU6F1
MA0814.2.TFAP2C
MA0746.1.SP3
MA0809.1.TEAD4
MA0162.2.EGR1
MA1585.1.ZKSCAN1
MA0753.1.ZNF740
MA0002.1.RUNX1
MA1647.1.PRDM4
MA0901.2.HOXB13
MA0475.2.FLI1
MA1468.1.ATOH7
MA0724.1.VENTX
MA1971.1.ZBED2
MA1100.1.ASCL1
MA1521.1.MAFA
MA0506.1.NRF1
MA1972.1.ZFP14
MA0812.1.TFAP2B
MA0062.3.GABPA
MA0081.2.SPIB
MA1587.1.ZNF135
MA0703.2.LMX1B
MA1652.1.ZKSCAN5
MA0667.1.MYF6
MA1935.1.ERF::FOXI1
MA1463.1.ARGFX
MA0668.1.NEUROD2
MA1487.2.FOXE1
MA0156.2.FEV
MA0497.1.MEF2C
MA1728.1.ZNF549
MA1112.2.NR4A1
MA0871.1.TFEC
MA0470.1.E2F4
MA0811.1.TFAP2B
MA1707.1.DMRTA1
MA0093.1.USF1
MA0767.1.GCM2
MA0774.1.MEIS2
MA0481.1.FOXP1
MA0764.1.ETV4
MA0685.2.SP4
MA0031.1.FOXD1
MA0524.2.TFAP2C
MA0140.2.GATA1::TAL1
MA0105.1.NFKB1
MA1478.1.DMRTA2
MA0488.1.JUN
MA1522.1.MAZ
MA0761.2.ETV1
MA0700.2.LHX2
MA0592.3.ESRRA
MA0742.2.KLF12
MA1964.1.SMAD2
MA0831.1.TFE3
MA1961.1.PATZ1
MA0819.1.CLOCK
MA1112.1.NR4A1
MA0613.1.FOXG1
MA0024.2.E2F1
MA0038.2.GFI1
MA1103.1.FOXK2
MA0028.1.ELK1
MA0079.5.SP1
MA0632.2.TCFL5
MA0048.2.NHLH1
MA0765.1.ETV5
MA1520.1.MAF
MA0157.2.FOXO3
MA1720.1.ZNF85
MA1117.1.RELB
MA1512.1.KLF11
MA0101.1.REL
MA0692.1.TFEB
MA1564.1.SP9
MA1102.2.CTCFL
MA0484.1.HNF4G
MA0095.2.YY1
MA1548.1.PLAGL2
MA1115.1.POU5F1
MA1592.1.ZNF274
MA0831.2.TFE3
MA1639.1.MEIS1
MA1103.2.FOXK2
MA0895.1.HMBOX1
MA0052.2.MEF2A
MA0747.1.SP8
MA1646.1.OSR2
MA0761.1.ETV1
MA1489.1.FOXN3
MA0003.2.TFAP2A
MA0741.1.KLF16
MA0715.1.PROP1
MA0114.2.HNF4A
MA0792.1.POU5F1B
MA0686.1.SPDEF
MA0471.2.E2F6
MA1936.1.ERF::FOXO1
MA1653.1.ZNF148
MA0155.1.INSM1
MA1574.1.THRB
MA0058.3.MAX
MA0756.2.ONECUT2
MA0516.1.SP2
MA1943.1.ETV2::HOXB13
MA0592.1.ESRRA
MA0610.1.DMRT3
MA0090.1.TEAD1
MA1122.1.TFDP1
MA1581.1.ZBTB6
MA1149.1.RARA::RXRG
MA1109.1.NEUROD1
MA0050.1.IRF1
MA1601.2.ZNF75D
MA0809.2.TEAD4
MA1562.1.SOX14
MA0646.1.GCM1
MA0819.2.CLOCK
MA0093.3.USF1
MA1542.1.OSR1
MA0148.4.FOXA1
MA0141.3.ESRRB
MA0827.1.OLIG3
MA0502.2.NFYB
MA0137.2.STAT1
MA0818.2.BHLHE22
MA1947.1.ETV5::FOXO1
MA1123.1.TWIST1
MA0825.1.MNT
MA0517.1.STAT1::STAT2
MA0526.3.USF2
MA1133.1.JUN::JUNB
MA1649.1.ZBTB12
MA1636.1.CEBPG
MA1954.1.FOXO1::ELK1
MA1657.1.ZNF652
MA0083.2.SRF
MA1934.1.ERF::FIGLA
MA1568.1.TCF21
MA0072.1.RORA
MA1554.1.RFX7
MA0024.1.E2F1
MA1123.2.TWIST1
MA0039.3.KLF4
MA0746.2.SP3
MA1110.1.NR1H4
